# Supplementary material
Source: publisher figshare collection journal article supplement (https://gsapubs.figshare.com/ndownloader/files/39429130)
Supplement: Supplementary file 1 [file 39429130]

## Sheet: SI-4
SI-4: Description of all localities plotted on the geologic map (Fig. 4A)
sample number	sample number (extended)	Latitude North (°)	Longitude West (°)	Title	Volcanic center	Map symbol	Compositional names	Map unit name	Outcrop Description	Figure Captions
55	55-AL-15-04-04-1	29.9567	-115.345	Sample 55	CE	Kh-m	basalt	Sills and plugs of mafic composition (Kh-m)	Basalt hypabyssal intrusion that forms an outcrop 200 m in diameter.	A: Hand sample of basalt hypabyssal intrusion, showing coherent homogenous character. B: Photomicrograph (crossed polars) of the basalt hypabyssal intrusion, showing plagioclase and altered remnant pyroxene phenocrysts. C - E: Total-alkalis vs silica diagram (C) of sample 55 in comparison to other hypabyssal intrusions (crosses) and compositional fields for primary lavas, lava domes, block-and-as…
56	56-AL-15-04-04-2	29.9579	-115.343	Sample 56	CE	Kl-m	basaltic trachyandesite	Lavas of mafic composition, with associated flow breccias (Kl-m)	Basaltic trachyandesite lava with flow breccia (coherent interior).	A: Outcrop photo of the basaltic trachyandesite lava, which weathers to a dark red color (backpack for scale). B: Outcrop photo of flow breccia in the basaltic trachyandesite lava (hiking pole for scale). C: Photomicrograph of the basaltic trachyandesite lava (plane light), showing altered plagioclase and epidote (pale green). D-F: Total-alkalis vs silica diagram (D) of sample 56 in comparison to…
127	127-AL-15-04-18-1	29.989	-115.423	Sample 127	CE	Kl-m, Kl-i	andesite	Lavas of mafic to intermediate composition, with associated flow breccias (Kl-m, Kl-i)	Andesite lava (2-5 m thick) interstratified with fluvially reworked mafic tuffs.	A: Outcrop photo showing base and top of the andesite lava; flow brecciation is better developed at the top than it is at the base. The section underlying the andesite lava consists of : (1) scoria-rich layers (with scattered blocks) interstratified with more poorly sorted scoria lapilli tuff layers, tentatively interpreted as pyroclastic fall deposits, but possibly fluvially reworked; (2) medium…
130	130-AL-15-04-18-4	29.992	-115.4	Sample 130	CE	Ki	130A: trachydacite (whole rock); 130B: rhyolite (pumice)	Ignimbrites - non-marine, mostly welded (Ki).	Welded dacite ignimbrite, 15-20 m thick, dominantly nonsorted and nonstratified, with some pumice-rich layers; pumice is flattened. Whole-rock (130A) and pumice (130B) analyzed for chemistry.	A: Outcrop photo of the ignimbrite showing compaction foliation and pumice-rich layers (pumices preferentially weathered out). B: Fallen block showing dominantly massive ignimbrite, with intervals of weaker welding compaction and stronger welding compaction. C-E: Total-alkalis vs silica diagram (C) of whole rock (130A) and pumice (130B) in comparison to other ignimbrites, volcaniclastic rocks, hy…
131	131-AL-15-04-18-5	29.9924	-115.407	Sample 131	CE	Kl-m	basaltic trachyandesite	Lavas of mafic composition, with associated flow breccias (Kl-m)	Basaltic trachyandesite lava with flow-top breccia.	A-C: Total-alkalis vs silica diagram (A) of sample 131 in comparison to other lavas, lava domes, and block-and-ash-flow tuffs (triangles), and hypabyssal intrusions (crosses). Black symbols are samples that we interpret to represent liquid compositions and gray symbols are samples that we interpret to have been affected by accumulation of major or trace phases. Extended trace element plot is norm…
141	141-AL-15-04-20-1	29.9782	-115.433	Sample 141	CE	Kh-m	basaltic andesite	Sills and plugs of mafic composition (Kh-m)	Hydrothermal breccia on margin of basaltic andesite sill, showing splintered and jigsaw clasts.	A: Coherent interior of sill with marginal hydrothermal breccia. Splintered and jigsaw clasts are supported in quartz veins (white). Hammer for scale. B-D: Total-alkalis vs silica diagram (B) of sample 141 in comparison to other lavas, lava domes, and block-and-ash-flow tuffs (triangles), and hypabyssal intrusions (crosses). Black symbols are samples that we interpret to represent liquid composit…
149	149-AL-15-04-21-3	29.9833	-115.392	Sample 149	CE	Kl-i	Trachyandesite - trachydacite	Lavas of intermediate composition, with associated flow breccias (Kl-i)	Trachyandesite/trachydacite aphyric lava.	A - B: Trachyandesite/trachydacite lava, forming a resistant layer (Photo A). The more recessive outcrops are interstratified fluvially reworked tuff and debris flow deposits above (Kvfdf), and mainly volcanic debris flow deposits below (Kvdf). Close-up outcrop photo of the lava, showing horizontal platy fabric (Photo B). C: Photomicrograph (crossed polars) of the aphyric lava with a microcrystal…
151	151-AL-15-04-21-5	29.9804	-115.39	Sample 151	CE	Kl-i	trachydacite	Lavas of intermediate to silicic composition, with associated flow breccias (Kl-i, Kl-s)	Trachydacite and andesite (inferred) lava and flow breccia (6-8 m thick).	A: Outcrop photo showing coherent interior (ca. 2 m thick) of trachydacite lava and top breccia (ca. 4-5 m thick). People for scale. B: Thin (30 cm) flow breccia within the coherent lava (interior) unit. Hammer for scale. C: Photomicrograph (crossed polars) showing plagioclase and lesser clinopyroxene phenocrysts (epidotized), some in glomerocrysts within a microcrystalline groundmass. D-F: Total…
155	155-AL-15-04-21-9	29.9825	-115.382	Sample 155	CE	Ki-A	rhyolite	Ignimbrite - tuff of Aguajito, mapped separately because of its volume and lateral extent (Ki-A)	Welded rhyolite ignimbrite (tuff of Aguajito), about 15 m from the base of the 200 m thick deposit.	A: Outcrop photo of cliff-forming tuff of Aguajito (lichen covers much of the welding texture on the outcrop). B: Photomicrograph (plane light) showing vitroclastic texture and compacted pumices, some showing axiolitic texture. C - E: Total-alkalis vs silica diagram (C) of sample 155 in comparison to other ignimbrites, volcaniclastic rocks, hypabyssal intrusions, and compositional fields for lava…
161	161-AL-15-04-22-5	29.9946	-115.393	Sample 161	CE	Kl-m	basaltic andesite	Lavas of mafic composition, with associated flow breccias (Kl-m)	80 m thick section of 4-5 m thick lavas, one with a basaltic andesite geochemical analysis.	A: Four lavas from part of the 80 m thick lava section (sample 161 is downsection from this). Coherent interiors form resistant outcrops, and intervening flow breccias are more recessive. B: Coherent interior of the sampled basaltic andesite lava (sample 161). C: Photomicrographs in plane light (L) and crossed polars (R) showing plagioclase phenocrysts in a groundmass of plagioclase, mafics (like…
162	162-AL-15-04-22-6	29.9945	-115.382	Sample 162	CE	Kplb-m	hornblende gabbro (56 wt.% siO2)	La Burra pluton - hornblende gabbro (Kplb-m)	Hornblende gabbro of the La Burra pluton (Plag 60%, Hbld 40%, Oxides <5%). Trace element chemistry indicates the gabbro is a hornblende cumulate.	A: Photomicrographs of the marginal hornblende gabbro in plane light (L) and crossed polars (R). B-D:Total-alkalis vs silica diagram (B) of sample 162 in comparison to other plutonic rocks (squares) and hypabyssal iintrusions (crosses). Black symbols are samples that we interpret to represent liquid compositions and gray symbols are samples that we interpret to have been affected by accumulation …
163	163-AL-15-04-22-7	29.9896	-115.37	Sample 163	CE	Kplb-f	leuco-granodiorite (74 wt.% siO2)	La Burra pluton - leuco-granodiorite (Kplb-f)	Leuco-granodiorite of the La Burra pluton (altered Feldspars 40-45%, Qtz 50-55%, Oxides <5%).	A-B: Outcrop photos of leuco-granodiorite of the La Burra pluton. Hammer (photo B) for scale. C: Photomicrographs of leuco-granodiorite in plane light (L) and crossed polars (R). Feldspars include albite and K-spar, and appear darker in plane light (i.e., heavily albitized from secondary alteration). D-F: Total-alkalis vs silica diagram (D) of sample 163 in comparison to other plutonic rocks (squ…
164	164-AL-15-04-22-8	29.9833	-115.375	Sample 164	CE	Ki-A	rhyolite	Ignimbrite - tuff of Aguajito, mapped separately because of its volume and lateral extent (Ki-A)	Highly welded rhyolite ignimbrite: tuff of Aguajito, about 15 m from the base of the 200 m deposit. Lithics are more common here.	A: Outcrop photo of the strongly welded tuff of Aguajito, showing strong eutaxitic foliation, and presence of white (silicic) volcanic rock fragments. B: Photomicrograph (plane light) showing highly flattened pumices, locally wrapping around rock fragments. Sparse small altered plagioclase. C-E:Total-alkalis vs silica diagram (C) of sample 164 in comparison to other ignimbrites, volcaniclastic ro…
165	165-AL-15-04-23-1	29.9745	-115.367	Sample 165	CE	Ki	rhyolite	Ignimbrite, non-marine, mostly welded (Ki)	Ultrawelded rhyolite ignimbrite.	A: Outcrop photo of ultrawelded rhyolite ignimbrite, showing extreme compaction of pumices. B: Photomicrograph (plain light) of ultrawelded welded rhyolite ignimbrite, showing extreme welding compaction of pumices. C-E: Total-alkalis vs silica diagram (C) of sample 165 in comparison to other ignimbrites, volcaniclastic rocks, hypabyssal intrusions, and compositional fields of lavas, lava domes, b…
167	167-AL-15-04-23-3	29.9721	-115.368	Sample 167	CE	Kld	dacite	Lava dome (Kld)	Dacite lava from a lava dome.	A: Photomicrograph (plane light) of dacite lava from the large lava dome body (Kld). Glomerocrysts of altered amphibole and plagioclase are set within a devitrified groundmass. B-D: Total-alkalis vs silica diagram (B) of sample 167 in comparison to other lavas, lava domes, and block-and-ash-flow tuffs (triangles) and hypabyssal intrusions (crosses). Black symbols are samples that we interpret to …
169	169-AL-15-04-23-5	29.975	-115.371	Sample 169	CE	Ki	rhyolite	Ignimbrite, non-marine, mostly welded (Ki)	Welded rhyolite ignimbrite.	A: Photomicrograph (plane light) of welded rhyolite ignimbrite showing compacted glass shards and pumice. B-D: Total-alkalis vs silica diagram (B) of sample 169 in comparison to other ignimbrites, volcaniclastic rocks, hypabyssal intrusions, and compositional fields for lavas, lava domes, block-and-ash-flow tuffs, and plutonic rocks. Black symbols are samples that we interpret to represent liquid…
177 (A,B)	177-AL-15-04-26-1	29.9937	-115.335	Sample 177A and 177B	CE	Kplb-f	177A: leucotonalite (71 wt.% siO2); 177B: basaltic andesite (enclave)	La Burra pluton - leuco-tonalite (Kplb-f)	177A: Leuco-tonalite of the La Burra pluton (Qtz 55%, Plag 35%, Hbld <10%, Oxides <3%) with coarse texture. 177B: Fine-grained mafic-intermediate enclaves (cm-scale).	A: Mafic-intermediate enclaves (177B) within the leuco-tonalite (177A) of the La Burra pluton. B: Photomicrographs in plane light (top) and crossed polars (bottom) of the leuco-tonalite. C: Photomicrograph in plane light of a mafic-intermediate enclave (177B) within the leuco-tonalite (177A). D-F: Total-alkalis vs silica diagram (D) of samples 177A (leuco-tonalite) and 177B (mafic-intermediate en…
178	178-AL-15-04-26-2	30.0442	-115.363	Sample 178	CE	Kh-s	rhyolite	Sills and plugs of silicic composition (Kh-s)	Coherent, fine-grained silicic intrusion outcroping recurrently within the tuff of Aguajito.	A: Photomicrograph in plane light showing altered mafic phenocrysts (likely hornblende) set in a microcrystalline groundmass. B-D: Total-alkalis vs silica diagram (B) of sample 178 in comparison to other hypabyssal intrusions (crosses) and compositional fields for lavas, lava domes, block-and-ash-flow tuffs, and plutonic rocks. Black symbols are samples that we interpret to represent liquid compo…
181	181-AL-16-02-29-2	30.0286	-115.454	Sample 181	CE	Kl-s	dacite	Lavas of silicic composition, with associated flow breccias (Kl-s)	Dacite lava with top flow breccia, forming a red, resistant outcrop of about 5-7 m thick, with platy banding.	A-B: Outcrop photo of the dacite lava flow showing coherent interior and top breccia (Photo A). Close-up of the basal flow breccia and coherent interior with platy banding (Photo B). C: Photomicrograph (crossed polars) showing planar alteration (platy banding). Plagioclase phenocrysts and minor glomerocrysts are set in a cryptocrystalline groundmass. D-F: Total-alkalis vs silica diagram (D) of sa…
183	183-AL-16-03-01-1	30.0212	-115.445	Sample 183	CE	Kplb-m	hornblende gabbro (57 wt.% siO2)	La Burra pluton - Hornblende gabbro (Kplb-m)	Marginal hornblende gabbro of the La Burra pluton (Plag 60%, Hbld 30%, Qtz <5%, Oxides <5%).	A-B: Outcrop photos of the marginal hornblende gabbro of the La Burra pluton. Hammer for scale (circled - A). C: Photomicrographs of the marginal hornblende gabbro in plane light (L) and crossed polars (R). Remnant pyroxene cores occur within some hornblende grains. Minor quartz. D-F: Total-alkalis vs silica diagram (D) of sample 183 in comparison to other plutonic rocks (squares) and hypabyssal …
184	184-AL-16-03-01-2	30.0217	-115.444	Sample 184	CE	Ku	dacite	Undifferentiated lavas/hypabyssal intrusions (Ku)	Altered lava or hypabyssal intrusion of dacite composition.	A: Outcrop photo of the undifferentiated lava or hypabyssal intrusion with dacitic composition. Person for scale. B: Photomicrograph (plane light) of the undifferentiated lava or hypabyssal intrusion, showing altered xenoliths set in a fine-grained matrix. C-E: Total-alkalis vs silica diagram (C) of sample 184 in comparison to other undifferentiated rocks (circles), hypabyssal intrusions (crosses…
185	185-AL-16-03-01-3	30.0224	-115.447	Sample 185	CE	Kbat-s	rhyolite (block)	Block & ash flow tuffs of silicic composition (Kbat-s)	Block-and-ash-flow tuff forming an outcrop of approximately 20 m thick. Blocks are 1-5 cm large.	A: Outcrop photo of the block-and-ash-flow tuff forming a cliff. B: Photomicrograph in plane light (top) and crossed polars (bottom) showing the block-and-ash-flow tuff matrix with plagioclase phenocrysts. C - E: Total-alkalis vs silica diagram (C) of sample 185 in comparison to other volcaniclastic rocks, ignimbrites, hypabyssal intrusions and compositional fields for lavas, lava domes, block-an…
188	188-AL-16-03-02-1	30.033	-115.45	Sample 188	CE	Kl-s	trachydacite	Lavas of silicic composition, with associated flow breccias (Kl-s)	Trachydacite lava forming a 20 m thick resistant outcrop (sample 188A) with columnar joints at the base and a 10 m thick top breccia (sample 188B).	A: Outcrop photo showing the coherent interior of the trachydacite lava with columnar jointing at the base, and top breccia. Sample collected from the coherent interior. B: Close-up photo of the top flow breccia. C: Photomicrographs in plane light (L) and crossed polars (R) of the trachydacite lava showing plagioclase and minor altered hornblende phenocrysts, set in a cryptocrystalline groundmass…
190 (A,B)	190-AL-16-03-02-3	30.0361	-115.442	Sample 190A and 190B	CE	Kplb-m	190A: Hornblende gabbro (51 wt.% siO2); 190B: Hornblende cumulate (52 wt.% siO2)	La Burra pluton - Gabbro (Kplb-m)	Gabbro of the La Burra pluton (190A: Plag 65%, Cpx 25%, Hbld 5%, Oxides <5%; 190B: Plag 65%, Cpx 20%, Hbld 15%, Oxides <5%).	A-B: Marginal gabbro of the La Burra pluton. Lenses of coarser gabbro occur and are interpreted as pegmatitic schlieren (water-rich zones - see photo A). Gabbro sampled (190A), and coarser lens (pegmatitic schlieren) sampled (190 B). Photo B shows both samples. C: Photomicrographs in plane light (L) and crossed polars (R) of gabbro sample 190A showing plagioclase with interstitial clinopyroxene. …
197	197-AL-16-03-06-2	30.0697	-115.434	Sample 197	CE	Kl-s	rhyolite	Lavas of silicic composition, with associated flow breccias (Kl-s)	Rhyolite lava with flow banding, on top of a pile of stacked lavas, forming a tabular mound.	A-B: Outcrop photo of the lava pile (Photo A), which overlies an ignimbrite (see samples 200 and 201). Close-up photo of silicic lava (Photo B). C: Photomicrographs in plane light (L) and crossed polars (R) of the rhyolite lava showing altered plagioclase and hornblende phenocrysts, sometimes occuring in glomerocrysts. Flow banding is evident in groundmass. D-F: Total-alkalis vs silica diagram (D…
198	198-AL-16-03-06-3	30.0606	-115.451	Sample 198	CE	Ki-A	rhyolite	Ignimbrite - tuff of Aguajito, mapped separately because of its volume and lateral extent (Ki-A)	Tuff of Aguajito - rhyolite ignimbrite exposed in the central subaerial edifice, showing extreme welding and forming a resistant outcrop.	A-B: Outcrop of extremely welded tuff of Aguajito (Photo A). Close-up photo of extremely welded tuff of Aguajito, showing highly compacted pumices (Photo B). In this area, the ignimbrite is rock-fragment poor. C: Photomicrograph in plane light (L) and crossed polars (R) showing eutaxitic foliation (fiamme). D-F: Total-alkalis vs silica diagram (D) of sample 198 in comparison to other ignimbrites,…
200	200-AL-16-03-08-2	30.0751	-115.424	Sample 200	CE	Ki-A	rhyolite	Ignimbrite - non-marine, mostly welded (Ki)	Welded rhyolite ignimbrite with basal vitrophyre.	A: Photomicrograph in plane light (L) and crossed polars (R) of the ignimbrite matrix showing sparse plagioclase phenocrysts and pumice shreds in a devitrified groundmass. B-D: Total-alkalis vs silica diagram (B) of sample 200 in comparison to other ignimbrites, volcaniclastic rocks, hypabyssal intrusions, and compositional fields for lavas, lava domes, block-and-ash-flow tuffs, and plutonic rock…
203	203-AL-16-03-11-2	30.0375	-115.44	Sample 203	CE	Kplb-m	hornblende cumulate (51 wt.% siO2)	La Burra pluton - hornblende cumulate within gabbro (Kplb-m)	Hornblende cumulate within gabbro of the La Burra pluton (Plag 70%, Hbld 25%, Oxides <5%).	A: Outcrop photo of hornblende cumulate (outlined) within the gabbro of the La Burra pluton. Hammer for scale. B: Photomicrograph in plane light (L) and crossed polars (R) of the hornblende cumulate. Similar to sample 202, however all clinopyroxene has been converted to hornblende. C-E: Total-alkalis vs silica diagram (C) of sample 203 in comparison to other plutonic rocks (including cumulates), …
206	206-AL-16-03-11-5	30.0391	-115.438	Sample 206	CE	Kplb-f	tonalite (64 wt.% siO2)	La Burra pluton - tonalite (Kplb-f)	Mixed hybrid tonalite (complex mixture of tonalite and gabbro) of the La Burra pluton (Plag 55%, Qtz 30%, Cpx <10%, Hbld <5%, trace zircons) abundant with fine-grained mafic to intermediate enclaves.	A: Mixed hybrid tonalite (complex mixture of tonalite and gabbro) of the La Burra pluton. B: Outcrop photo displaying cm-sized, fine-grained mafic to intermediate enclaves within the mixed hybrid tonalite (hammer for scale). C: Fine-grained mafic to intermediate enclaves commonly display miarolitic cavities (pen for scale). D: Photomicrograph (plane light) of the mixed hybrid tonalite. Clinopyxen…
208	208-AL-16-03-12-2	30.0283	-115.455	Sample 208	CE	Kbat-s	rhyolite (block)	Block & ash flow tuff of silicic composition (Kbat-s)	Rhyolite block within the block-and-ash-flow tuff.	A: Rhyolite block from the massive block-and-ash-flow tuff. B: Photomicrographs in plane light (top) and crossed polars (bottom) showing broken plagioclase and altered hornblende phenocrysts set in a tuff matrix. C-E: Total-alkalis vs silica diagram (C) of sample 208 (rhyolite block) in comparison to other lavas, lava domes, and block-and-ash-flow tuffs (triangles) and hypabyssal intrusions (cros…
209	209-AL-16-03-12-3	30.0278	-115.453	Sample 209	CE	Kbat-s	trachydacite	Block & ash flow tuff of silicic composition (Kbat-s)	A sampled trachydacite block within a block-and ash-flow tuff. The size of the blocks range from <10 cm to >1m (mega-block).	A-B: Outcrop photo of the block-and-ash-flow tuff (Photo A). Close-up of the sampled trachydacite mega-block (outlined) (Photo B). C: Photomicrographs in plane light (L) and crossed polars (R) of the sampled mega-block. Plagioclase phenocrysts and glomerocrysts of plagioclase and minor mafic minerals (likely altered hornblende or pyroxene) are set in a tuff matrix. D-F: Total-alkalis vs silica di…
211	211-AL-16-03-13-2	29.9845	-115.433	Sample 211	CE	Kl-m	basaltic andesite	Lavas of mafic composition, with associated flow breccias (Kl-m)	Basaltic andesite lava flow (3-5 m thick), with xenoliths. Top of flow has vesicular texture.	A: Basaltic andesite flow with xenoliths (outlined). B: Photomicrographs (crossed polars) of the basaltic andesite lava flow, showing xenoliths set in a microcrystalline groundmass. Some xenoliths are coarse-grained plagioclase cumulates. C-E: Total-alkalis vs silica diagram (C) of sample 211 in comparison to other lavas, lava domes, and block-and-ash-flow tuffs (triangles) and hypabyssal intrusi…
228	228-AL-16-03-17-2	29.9623	-115.327	Sample 228	CE	Ku	dacite	Undifferentiated lavas/hypabyssal intrusions (Ku)	Coherent lava or hypabyssal intrusion of dacite composition, displaying cm-sized spherulites.	A: Outcrop photo (bird’s eye view) of the lava or hypabyssal intrusion showing cm-sized spherulites. Foot for scale (lower left photo). B: Close-up photo (cross-section view) showing the cm-sized spherulites. C: Photomicrograph in crossed polars of the lava or hypabyssal intrusion showing glomerocysts of plagioclase and minor mafics (likely hornblende) within a microcrystalline groundmass. D-F: T…
234	234-AL-16-03-18-2	29.9615	-115.32	Sample 234	CE	Kh-s	dacite	Sills and plugs of silicic composition (Kh-s)	Dacite hypabyssal intrusion located on the margins of the San Fernando pluton.	A-B: Outcrop photo of the dacite hypabyssal intrusion (Photo A). Close-up showing vesicles (near hammer), suggesting a shallow-level intrusion (Photo B). C: Photomicrographs in plane light (L) and crossed polars (R) of the dacite hypabyssal intrusion showing altered hornblende and fewer plagioclase phenocrysts set in a microcrystalline groundmass. D-F: Total-alkalis vs silica diagram (D) of sampl…
238 (A,B)	238-AL-16-03-20-4	30.0689	-115.347	Sample 238A and 238B	CE	no label - leucocratic intrusion & Kav	238A: leucocratic intrusion - granitic (70 wt.% sio2); 238B: dacite	La Burra pluton - leucocratic intrusion and altered volcanic rocks (Kav)	Leucocratic intrusion of the La Burra pluton (238A: Qtz 40%, Albite 30%, K-spar <25%, Hbld 5%, Oxides <3%), and altered volcanic blocks (238B: Kav).	A: Photomicrograph in plane light (L) of the altered volcanic rocks (Kav). B: Photomicrographs in plane light (L) and crossed polars (R) of the leucocratic intrusion of the La Burra pluton. C-E: Total-alkalis vs silica diagram (C) of sample 238A (leucocratic intrusion) in comparison to other plutonic rocks (squares) and hypabyssal intrusions (crosses). Black symbols are samples that we interpret …
250	250-AL-16-03-21-3	30.0447	-115.287	Sample 250	CE	Kplb-f	leuco-granodiorite (74 wt.% siO2)	La Burra pluton - leuco-granodiorite (Kplb-f)	Leuco-granodiorite of the La Burra pluton (Qtz 40%, Albite 35%, K-spar 15%, Hbld <10%, Oxides <3%). Trace element chemistry indicates the sample is a feldspar cumulate.	A: Outcrop photo of the leuco-granodiorite of the La Burra pluton (hammer for scale). B: Photomicrographs of the leuco-granodiorite of the La Burra pluton in plane light (top) and crossed polars (bottom). C-E: Total-alkalis vs silica diagram (C) of sample 250 in comparison to other plutonic rocks (squares) and hypabyssal intrusions (crosses). Black symbols are samples that we interpret to represe…
252	252-AL-16-03-21-5	30.0698	-115.349	Sample 252	CE	Kav	rhyolite	Altered volcanic rocks (Kav)	Altered lava or hypabyssal intrusion of rhyolite composition.	A: Photomicrographs in plane light (L) and crossed polars (R) of the aphyric undifferentiated altered volcanic unit. B-D: Total-alkalis vs silica diagram (B) of sample 252 in comparison to other undifferentiated rocks (circles), hypabyssal intrusions (crosses), and compositional fields for lavas, lava domes, block-and-ash-flow tuffs, and plutonic rocks. Black symbols are samples that we interpret…
128	128-AL-15-04-18-2	29.9945	-115.42	Sample 128	CE	Kvf-m	basaltic trachyandesite	Fluvially reworked tuffs with dominantly mafic to intermediate clasts (Kvf-m)	Fluvially reworked basaltic trachyandesite tuff and lapilli tuff, with well-developed stratification and cross stratification.	A: Outcrop photo of fluvially reworked basaltic trachyandesite tuff, showing planar lamination and large-scale cross lamination. B: Close-up photo of outcrop, showing moderately well-sorted tuff and lapilli tuff (lapilli are weathered out). Small-scale normal faults shown. C: Photomicrographs in plane light (L) and crossed polars (R) of the basaltic trachyandesite tuff, showing good sorting with …
236	236-AL-16-03-20-2	30.0763	-115.356	236/Al16-03-20-2	CE	Kav	andesite	Altered volcanic rocks (Kav)	Altered lava or hypabyssal intrusion of andesite composition.	A: Photomicrographs in plane light (L) and crossed polars (R) of the intrusion showing altered hornblende and fewer plagioclase phenocrysts set in a devitrified groundmass. B-D: Total-alkalis vs silica diagram (B) of sample 236 in comparison to other undifferentiated rocks (circles), hypabyssal intrusions (crosses) and compositional fields for lavas, lava domes, block-and-ash-flow tuffs, and plut…
58	58-AL-15-04-04-4	29.936	-115.344	Sample 58	CE	Kl-d		Lava domes and associated dome talus (Kld)	Complexly interleaved coherent and brecciated silcic lava, forming a body >100 m thick.	A: Outcrop photo of a coherent part of the silicic lava dome. Person for scale (circled). Dome is subvertically intruded by San Fernando pluton, northeast of photo field of view (sample 59). B: Outcrop photo of a brecciated part of the altered lava dome. The coherent and brecciated parts are complexly interleaved. C: Close-up of lithics/clasts within the brecciated part of the lava dome. Hand len…
129	129-AL-15-04-18-3	29.9925	-115.4	Sample 129	CE			Undifferentiated lavas/hypabyssal intrusions (Ku)	Sill or lava of inferred mafic composition.	A: Sill or lava of mafic- to mafic-intermediate composition, showing upper contact with ignimbrite. Contact is sharp, as would be expected from a sill, but some top brecciation is faintly visible, so it could be a lava. B: Photomicrograph (cross polars) showing larger and smaller plagioclase crystals set in a microcrystalline groundmass of plagioclase microlites and mafics (likely hornblende or p…
132	132-AL-15-04-18-6	29.9912	-115.413	Sample 132	CE	Kvf-m		Fluvially reworked tuffs with dominantly mafic clasts (Kvf-m)	Thick (5-7 m) bed of massive tuff, interpreted as hyperconcentrated flood flow deposit.	A: Photomicrographs in plane light (L) and crossed polars (R) showing rounded to angular volcanic rock fragments and lesser dark-colored fragments that may be relict glass.
133A&B	133-AL-15-04-19-1	29.9928	-115.431	Sample 133A and 133B	CE	Kvf-m, Kl-m		Fluvially reworked tuffs with dominantly mafic clasts (Kvf-m: 133A); and lavas of mafic composition, with associated flow breccias (Kl-m)	Fluvially reworked tuff bed >2 m thick (base not exposed), nonsorted and nonstratified (sample 133A), complexly invaded by an overlying 2 m thick lava (sample 133B), forming peperite.	A: Outcrop photo showing massive fluvially reworked tuff (133A), overlain by lava with peperitic base (133B), forming irregular load structures into the tuff below. 50 lb dog for scale. B: Close-up of the peperitic base of the lava, showing a pod of lava that detached and sank into the tuff while it was still unlithified and likely water saturated.
134B	134-AL-15-04-19-2	29.9929	-115.431	Sample 134	CE	no label - dike		Dikes of mafic composition	Dike of inferred mafic composition: tabular subvertical body, 2-3 m wide, cross-cutting fluvially reworked tuffs and overlying lava flows.	A: Photomicrograph in plane light (L) and crossed polars (R) of dike with relatively fresh plagioclase phenocrysts up to 3 mm in a microcrystalline groundmass.
135 (Outstanding Site A)	135-AL-15-04-19-3	29.9923	-115.434	Site 135 - Outstanding Site A	CE	Kvfdf-m		Volcanic debris flow deposits with dominantly mafic to intermediate clasts (Kvfdf-m)	Volcanic debris flow deposit >5 m thick (base not exposed), massive and unsorted with angular clasts.	A: Outcrop photo of volcanic debris flow deposit, showing massive nonsorted and nonstratified character, matrix supported, and angular clasts. Composed dominantly of mafic to intermediate volcanic clasts. B: Outcrop photo of rare silicic volcanic block in the debris flow composed largely of mafic to intermediate clasts.
136	136-AL-15-04-19-4	29.9902	-115.433	Sample 136	CE	Kvf-m		Fluvially reworked tuffs with dominantly mafic to intermediate clasts (Kvf-m)	Up to 5 m thick section of fluvially reworked tuff and lapilli tuff with dominantly mafic to intermediate clasts, well stratified to crudely stratified.	A: Outcrop photo of fluvially reworked tuffs, largely crudely stratified with lesser well stratified intervals, representing a combination of hyperconcentrated flood flow and dilute flow. B: Outcrop photo close-up of A, showing lapilli tuff and lesser tuff with dominantly crude stratification and variability in sorting, with outsized blocks. C: Photomicrograph (plane light) of fluvially reworked …
137 (Outstanding Site B)	137-AL-15-04-19-5	29.9873	-115.432	Site 137 - Outstanding Site B	CE	Kl-m, Kvfdf-m		Lavas of mafic composition, with associated flow breccias (Kl-m), interstratified with fluvially-reworked tuffs and debris flow deposits, with dominantly mafic to intermediate clasts (Kvfdf-m)	Mafic lava flows, interstratified with fluvially reworked mafic tuffs (no sorting, crude bedding). Lava flows form resistant outcrops of about 5-10 m compared to the tuffs. Lavas have flat bases and there is lateral continuity of lavas and volcaniclastic beds.	A: Overview of nonmarine lavas and volcaniclastic rocks on the central subaerial edifice, showing interstratification of resistant mafic lavas (Kl-m) with softer outcrops of fluvially-reworked mafic tuffs and mafic debris flow deposits (Kvfdf-m). Note flat bases on lavas and lateral continuity of lavas and volcaniclastic beds; this is attributed to deposition in a rapidly-subsiding graben (Busby …
138	138-AL-15-04-19-6	29.9848	-115.433	Site 138	CE	Ku		Undifferentiated lavas/hypabyssal intrusions (Ku)	Lava or hypabyssal intrusion of inferred mafic composition. Sample too altered to do thin section or chemistry	A-B: Outcrop photo of the lava or hypabyssal intrusion, backpack for scale (Photo A). Close-up outcrop photo, hammer for scale (Photo B).
139	139-AL-15-04-19-7	29.9682	-115.439	Site 139	CE	Kl-m		Lavas of mafic composition, with associated flow breccias (Kl-m)	Lava, forming a 2 m thick resistant unit.	A: 2 m thick resistant lava with flow banding, locally platy.
140	140-AL-15-04-19-8	29.9679	-115.439	Site 140	CE	Kvf-m		Fluvially reworked tuffs with dominantly mafic clasts (Kvf-m)	Thin- to medium-bedded fluvially reworked tuffs.	A: Thin- to medium-bedded fluvially-reworked tuffs, with planar lamination.
142	142-AL-15-04-20-2	29.9788	-115.434	Site 142	CE	Kl-m		Lavas of mafic composition, with associated flow breccias (Kl-m)	Altered lavas, no thin section or chemistry. Inferred mafic composition.	A: Outcrop photo of coherent, altered lava flow.
143	143-AL-15-04-20-3	29.9779	-115.435	Sample 143	CE	Kl-m		Lavas of mafic composition, with associated flow breccias (Kl-m)	Coherent and flow-brecciated altered lava, approximately 5-7 m thick. Inferred mafic composition.	A: Outcrop photo of flow-brecciated lava, altered, with viens. B: Photomicrographs in plane light (L) and crossed polars (R) of the lava, with altered hornblende and plagioclase in a microcrystalline groundmass.
144 (Outstanding Site C)	144-AL-15-04-20-4	29.9784	-115.439	Site 144 - Outstanding Site C	CE	Kl-m		Lavas of mafic composition, with associated flow breccias (Kl-m)	Altered lavas, approximately 4 m thick. Inferred mafic composition.	A: Resistant lava overlying fluvially-reworked tuffs.
145	145-AL-15-04-20-5	30.039	-115.356	Sample 145	CE	Kplb-f		La Burra pluton - leuco-tonalite (Kplb-f) and leucocratic intrusions	Leuco-tonalite of the La Burra pluton (145: Qtz 50%, Plag 40-45%, Cpx <5%, Hbld <1%, Oxides <1%), intruded by finer-grained leucocratic rocks (146: Qtz + Feldspars).	A: Outcrop photo of the finer-grained leucocratic intrusion (sample 146), that intrudes the leuco-tonalite (sample 145) of the La Burra pluton. The intrusion is m-scale (~10 m wide) and forms a linear ridge trending NW-SE. B: Photomicrographs of the leuco-tonalite in plane light (L) and crossed polars (R). Cpx grains are minor (<5%), but where present display heavy disequilibrium textures (highly…
146	146-AL-15-04-20-6	30.0133	-115.339	Sample 145 and 146	CE	Kplb-f		La Burra pluton - leuco-tonalite (Kplb-f) and leucocratic intrusions	Leuco-tonalite of the La Burra pluton (145: Qtz 50%, Plag 40-45%, Cpx <5%, Hbld <1%, Oxides <1%), intruded by finer-grained leucocratic rocks (146: Qtz + Feldspars).	A: Outcrop photo of the finer-grained leucocratic intrusion (sample 146), that intrudes the leuco-tonalite (sample 145) of the La Burra pluton. The intrusion is m-scale (~10 m wide) and forms a linear ridge trending NW-SE. B: Photomicrographs of the leuco-tonalite in plane light (L) and crossed polars (R). Cpx grains are minor (<5%), but where present display heavy disequilibrium textures (highly…
147	147-AL-15-04-21-1	29.9833	-115.388	Sample 147	CE	Kh-m		Sills and plugs of mafic composition (Kh-m)	Hypabyssal intrusion of inferred mafic composition.	A: Hypabyssal intrusion, showing abundant plagioclase phenocrysts. B: Photomicrographs in plane light (L) and crossed polars (R) showing large plagioclase phenocrysts, some in glomerocrysts. Sparse mafic phenocrysts, likely pyroxene or hornblende.
148	148-AL-15-04-21-2	29.9823	-115.388	Sample 148	CE	Ku		Undifferentiated lavas/hypabyssal intrusions (Ku)	Altered lava or hypabyssal intrusion.	A: Outcrop photo of the altered lava or hypabyssal intrusion. Hammer for scale. B: Photomicrographs in plane light (top) and crossed polars (bottom) showing plagioclase and altered hornblende phenocrysts in a microcrystalline groundmass.
150	150-AL-15-04-21-4	29.9827	-115.391	Sample 150	CE	Kvdf-m		Volcanic debris flow deposits with dominantly mafic to intermediate clasts (Kvdf-m)	Volcanic debris flow deposit >15 m thick (base not exposed), nonsorted and nonstratified, with polymict rounded to angular volcanic clasts.	A: Unsorted, nonstratified volcanic debris flow deposit, with mainly dark-colored volcanic clasts inferred to be mafic- to intermediate in composition. B: Photomicrographs in plane light (L) and crossed polars (R) of the matrix of the volcanic debris flow deposit, showing poor sorting and presence of rounded to angular clasts. Clasts are mainly very similar, but with variable plagioclase contents…
152	152-AL-15-04-21-6	29.9813	-115.39	Sample 152	CE	Kh-m		Sills and plugs of mafic composition (Kh-m)	Hypabyssal intrusion of inferred mafic composition, intruding trachydacite lava (sample 151).	A: Outcrop photo showing the hypabyssal intrusion cross-cutting a coherent part of the the trachydacite lava. Note the sharp contact (white dashed line). Large (ca. 3 m long) silicic xenolith in hypabyssal intrusion (black dashed line). B: Silicic xenolith, and porphyritic nature of the intrusion. C: Photomicrograph in crossed polars of the hypabyssal intrusion showing plagioclase phenocrysts set…
153	153-AL-15-04-21-7	29.9817	-115.389	Sample 153	CE	Kvfdf-m		Interstratified fluvially reworked tuffs and debris flow deposits with dominantly mafic- to intermediate clasts (Kvfdf-m)	Alternating debris flow deposits (ca. 1.5-2 m thick) and fluvially reworked tuffs (ca. 0.3-0.5 m thick), with clasts of mainly mafic to intermediate composition.	A: Outcrop photo of a 4 m thick part of a ca. 50 m thick section of alternating volcanic debris flow deposits and fluvially reworked tuffs. Bed #1 is a matrix-supported debris flow deposit (unsorted and largely massive with faint stratification near top) that passes gradationally upward into a well-sorted largely massive fluvially reworked tuff with stratification locally preserved beneath the ba…
156	156-AL-15-04-21-10	29.9834	-115.381	Sample 156	CE	Ki-A		Ignimbrite - tuff of Aguajito, mapped separately because of its volume and lateral extent (Ki-A)	Ignimbrite (tuff of Aguajito): 10 m thick tuff interval in the middle of the welded rhyolite ignimbrite.	A: Outcrop photo of a part of the 10 m thick tuff interval, within the tuff of Aguajito. White massive to locally faintly stratified. Likely records a pause in the eruption of the welded tuff of Aguajito. B: Photomicrographs in plane light (L) and crossed polars (R) showing sparse plagioclase phenocrysts within an ash matrix.
157	157-AL-15-04-22-1	29.991	-115.399	Site 157	CE	Kvdf-m		Volcanic debris flow deposits with dominantly mafic to intermediate clasts (Kvdf-m)	Volcanic debris flow deposit (ca. 15 m thick).	A: Volcanic debris flow deposit.
158	158-AL-15-04-22-2	29.9903	-115.397	Site 158	CE	Ki		Ignimbrite, non-marine, mostly welded (Ki)	Ignimbrite interstratified with non-marine volcaniclastic rocks, non-welded.	A: Outcrop photo of ignimbrite with large, poorly compacted pumice blocks (dark gray), set in a matrix with abundant small white pumice clasts.
159	159-AL-15-04-22-3	29.9904	-115.395	Sample 159	CE	Kl-m		Lavas of mafic composition, with associated flow breccias (Kl-m)	Coherent amygdaloidal lava. Inferred mafic composition.	A: Lava flow. B: Photomicrographs in plane light (L) and crossed polars (R) showing amygdaloidal texture of the lava flow. Amygdules are filled with secondary replacement minerals.
160	160-AL-15-04-22-4	29.991	-115.394	Sample 160	CE	Kl-m		Lavas of mafic composition, with associated flow breccias (Kl-m)	Lava of inferred mafic composition.	A: Lava flow breccia. B: Photomicrographs in plane light (L) and crossed polars (R) showing glomerocrysts of clinopyroxene and plagioclase (epidotized) in a microcrystalline groundmass.
174	174-AL-15-04-24-5	29.9562	-115.361	Site 174	CE	Kld		Lava dome (Kld)	Silicic lava dome.	A: Resistant silicic lava dome.
176	176-AL-15-04-25-2	29.961	-115.328	Site 176	CE	Kl-s		Undifferentiated lavas/hypabyssal intrusions (Ku)	Coherent lava or hypabyssal intrusion displaying cm-sized spherulites.	A: Spherulites within the undifferentiated lava or hypabyssal intrusion.
179	179-AL-15-04-26-3	30.0443	-115.364	Sample 179	CE	Ki-A		Ignimbrite - tuff of Aguajito, mapped separately because of its volume and lateral extent (Ki-A)	Silicic tuff layer within the tuff of Aguajito.	A: Photomicrographs in plane light (L) and crossed polars (R) of the silicic tuff showing relict plagioclase crystals in an ash matrix.
180	180-AL-16-02-29-1	30.0285	-115.455	Site 180	CE	Kbat-s		Block & ash flow tuffs of silicic composition (Kbat-s)	Silicic block from a block-and-ash-flow tuff.	A: Silicic block within a block-and-ash-flow tuff. Pen for scale.
182	182-AL-16-02-29-3	30.0211	-115.458	Site 182	CE	Ki		Ignimbrite (Ki)	Welded ignimbrite forming a resistant cliff (~ 25 m thick).	A-B: Outcrop photo showing ignimbrite forming a resistant cliff, approximately 25 m thick (Photo A). Close-up outcrop photo shows weathered surface and eutaxitic foliation (fiamme) of the welded ignimbrite (Photo B).
187	187-AL-16-03-01-5	30.0235	-115.454	Site 187	CE	Kvf-s		Fluvially reworked tuffs with dominantly silicic clasts (Kvf-s)	Fluvially reworked tuffs.	A: Outcrop photo of fluvially reworked tuff.
189	189-AL-16-03-02-2	30.0346	-115.447	Sample 189	CE	Kvdf-s		Volcanic debris flow deposits with dominantly silicic clasts (Kvdf-s)	Volcanic debris flow, very altered.	A: Very altered/weathered outcrop of a volcanic debris flow. Boot for scale.
191	191-AL-16-03-02-4	30.0172	-115.453	Site 191	CE	Ku		Undifferentiated lavas/hypabyssal intrusions (Ku)	Altered lava or hypabyssal intrusion.	A: Outcrop photo of altered lava or hypabyssal intrusion.
193	193-AL-16-03-05-1	30.0274	-115.4	Sample 193	CE	Ki-A		Ignimbrite - tuff of Aguajito, mapped separately because of its volume and lateral extent (Ki-A)	Top of the tuff of Aguajito, extremely altered, forming a discontinuous, bright red (due to alteration) cliff, about 5 m thick.	A-B: Close-up photos (Photo A and B) of extremely welded and altered tuff of Aguajito. Eutaxitic texture (fiamme) is evident on the weathered surface (Photo B). Hammer head for scale (A), hammer handle for scale (B). C: Photomicrograph in plane light showing the highly welded texture.
199	199-AL-16-03-08-1	30.073	-115.423	Site 199	CE	Kh-s		Sills and plug of silicic composition (Kh-s)	Coherent, fine grained silicic hypabyssal intrusion outcroping within the welded ignimbrite.	A: Outcrop photo of silicic hypabyssal intrusion. Hammer for scale.
201	201-AL-16-03-08-3	30.0759	-115.427	Sample 201	CE	Ki-A		Ignimbrite (Ki)	Welded rhyolite ignimbrite (top).	A: Outcrop photo of the rhyolite welded ignimbrite. Ignimbrite has a basal vitrophyre that abruptly gets stratified upward, forming a 10-15 m thick cliff. The welding is more pronounced on the upper part of the ignimbrite. B: Photomicrograph in plane light (L) and crossed polars (R) of the ignimbrite matrix showing compacted pumices, few plagioclase phenocrysts and sparse clasts.
202	202-AL-16-03-11-1	30.036	-115.442	Sample 202	CE	Kplb-m		La Burra pluton - gabbro (Kplb-m)	Mafic cumulate within marginal gabbro of the La Burra pluton (202: Plag 65%, Cpx 20%, Hbld 15%, Oxides <5%). Coarse texture.	A: Outcrop photo of the marginal gabbro and mafic cumulate (outlined) of the La Burra pluton (pen for scale). B: Photomicrographs in plane light (L) and crossed polars (R) of the mafic cumulate within the marginal gabbro. Cumulate consists of plagioclase, clinopyroxene, and hornblende. Hornblende grains have been converted from clinopyroxene.
204	204-AL-16-03-11-3	30.0378	-115.438	Site 204	CE	Kplb-m/i/f		La Burra pluton - comingled gabbro and tonalite (Kplb-m/i/f)	Comingled zone varying from gabbro to tonalite. Tonalite likely varies from intermediate to felsic in composition.	A-C: Outcrop photos displaying a comingled zone of gabbro and tonalite. Different outcrop shades suggest varied compositions. No photomicrographs.
205	205-AL-16-03-11-4	30.0382	-115.438	Site 205	CE	Kplb-m/f		La Burra pluton - gabbro (Kplb-m) and leucocratic intrusions	Leucocratic rocks of the La Burra pluton intruding marginal gabbro.	A: Outcrop photo of a leucocratic intrusion cross-cutting marginal gabbroic rocks of the La Burra pluton.
207A	207-AL-16-03-12-1	30.0277	-115.454	Sample 207	CE	Kvf-s		Fluvially reworked tuffs with dominantly silicic clasts (Kvf-s)	Medium- to thick-bedded fluvially reworked tuffs and lapilli tuffs, interbedded with silicic lavas and silicic block-and-ash-flow tuffs. Locally, ash fall deposits are preserved, forming thin beds.	A-B: Outcrop photo of the fluvially reworked tuffs, forming medium to thick beds (Photo A). Close-up of preserved ash fall deposits, forming a thin bed, interbedded between a reworked lapilli tuff and a tuff (Photo B). C: Photomicrograph in plane light (L) and crossed polars (R) of the contact between the fluvially reworked lapilli tuff and the ash fall deposit.
212	212-AL-16-03-13-3	29.9906	-115.433	Sample 212	CE	Kl-m		Lavas of mafic composition, with associated flow breccias (Kl-m)	Amygdaloidal lava that forms a peperite.	A-B: Outcrop photo of the amygdaloidal lava that forms a peperite, where it has intruded the surrounding unconsolidated, fluvially reworked tuffs and debris flow deposits (Photo A). Pillow-like contacts with the surrounding tuff indicates mixing with an unconsolidated, water-saturated host (Photo B). C: Close-up outcrop photo of the amygdaloidal lava that forms a peperite. Visible calcite-filled …
226	226-AL-16-03-16-4	30.0038	-115.336	Sample 226	CE	Kplb-i		La Burra pluton - tonalite (Kplb-i)	Mixed hybrid tonalite (complex mixture of tonalite and gabbro) of the La Burra pluton (Plag 50%, Qtz 30%, Cpx 15-20%, Hbld <3%, Oxides <1%).	A: Outcrop photo of a mixed hybrid tonalite (complex mixture of tonalite and gabbro) of the La Burra pluton (field book for scale - circled). B: Photomicrographs in plane light (L) and crossed polars (R) of the mixed hybrid tonalite of the La Burra pluton. Clinopyroxene grains display disequilibrium textures (highly sieved and embayments).
230	230-AL-16-03-17-4	29.9657	-115.335	Sample 230	CE	Ki		Ignimbrite (Ki)	Ignimbrite forming a 30 m thick outcrop on top of a mount. Eutaxitic textures are not well preserved.	A: Outcrop photo showing compaction fabric in the welded ignimbrite. B: Photomicrographs in plane light (L) and crossed polars (R) of the ignimbrite matrix showing altered groundmass, with slight eutaxitic texture preserved. Sparse plagioclase phenocrysts typically occur in glomerocrysts.
235	235-AL-16-03-20-1	30.0731	-115.356	Site 235	CE	Kplb-f		La Burra pluton - Leucocratic intrusion	Leucocratic intrusion of the La Burra pluton forming a NW-SE trending ridge, intruding altered volcanic rocks (Kav).	A-B: Leucocratic rocks of the La Burra pluton (Kplb-f) forming NW-SE trending ridges.
243	243-AL-16-03-20-9	30.0984	-115.361	Sample 243	CE	no label - dike		Dikes of mafic composition	Dike of inferred mafic composition, entirely mineralyzed, intruding the La Burra pluton. Dike is about 200 m long and a few meters wide. It is rich plutonic fragments and located close to a mine.	A: Outcrop photo of the dike (dashed-line) cross-cutting the surrounding La Burra pluton. B-C: Close-up outcrop photos showing felsic fragments from the La Burra pluton within the mineralized mafic dike. D: Photomicrographs in plane light (L) and crossed polars (R) showing abundant plutonic fragments within a mafic microcrystalline groundmass.
4	4-AL-14-12-09-4	30.1807	-115.549	Sample 4	NFBB	Kda	dacite	Debris avalanche deposit (Kda)	Rheomorphic dacite ignimbrite slabs within debris avalanche matrix, inferred to represent ultra-welded tuff of Aguajito that became incorporated into the debris avalanche while still hot. Slabs are up to 100 m long and up to 15 m thick. Peperitic margins on slabs formed as hot ignimbrite interacted with the wet volcaniclastic matrix.	A: Outcrop photo of dacite ignimbrite slab (tuff of Aguajito) within the debris avalanche deposit showing welded texture. B: Outcrop photo of dacite ignimbrite slab within the debris avalanche deposit showing rheomorphic folding. C: Peperitic margin of rheomorphic ignimbrite within debris avalanche host. D: Photomicrograph of dacite ignimibrite (plane light), showing strong welding. E-G: Total-al…
13	13-AL-14-12-09-5	30.1731	-115.556	(see sample 12)	NFBB	Kh-m	basaltic andesite	Sills and plugs of mafic composition (Kh-m)	Basaltic andesite sill, approximately 25 m thick, that intrudes marine tuff turbidites.	A: Outcrop panorama of sill, with white thin-bedded silicic tuff beds below and greenish brown thin-bedded mafic tuffs above. These in turn are overlain by a mafic lava (on skyline). Overlying beds are disturbed by the intrusion. Sample 12 collected on NW side of canyon (shown), sample 13 collected on SE side of canyon (not shown). B: Photomicrograph of sample 12, in plane light (L) and crossed p…
14	14-AL-14-12-10-6	30.1739	-115.559	Sample 14	NFBB	Kl-m	basaltic andesite	Lavas of mafic composition, with associated flow breccias (Kl-m)	Basaltic andesite lava, coherent interior sampled for geochemistry.	A: Resistant ridge-forming outcrop of basaltic andesite lava, 30m thick. B: Photomicrograph of basaltic andesite lava (plane light) showing sparse glomerocrysts. C: Total-alkalis vs silica diagram (C) of sample 14 in comparison to other lavas, lava domes, and block-and-ash-flow tuffs (triangles), and hypabyssal intrusions (crosses). Black symbols are samples that we interpret to represent liquid …
15	15-AL-14-12-10-7	30.171	-115.558	Sample 15	NFBB	Kh-m	basaltic trachyandesite	Dikes of mafic composition	Tabular basaltic trachyandesite dike cross-cutting the stratigraphy at a low angle.	A: Photomicrograph (crossed polars) of tabular basaltic trachyandesite dike, showing flow alignment of plagioclase microlites in groundmass and sparse remnant plagioclase glomerocrysts. B - D: Total-alkalis vs silica diagram (B) of sample 15 in comparison to other hypabyssal intrusions (crosses) and compositional fields for lavas, lava domes, block-and-ash-flow tuffs (B&AFTs), and plutonic rocks.…
18	18-AL-14-12-10-10	30.1676	-115.563	Sample 18	NFBB	Khc-m	basaltic andesite	Hyaloclastite breccias, mafic to intermediate composiiton (Khc-m)	Unsorted breccias of blocky polyhedral glass fragments and partial or whole pillows or pillow-like objects, in thick structureless beds. Sample was taken from a block and is basaltic andesite.	A: Outcrop photo of basaltic andesite hyaloclastite breccia, showing larger irregularly-shaped pillow-like fragments with quencehd rims (outlined), and smaller blocky polyhedral fragments. B: Photomicrograph of block from the basaltic andesite hyaloclastite breccia (plane light) This groundmass is not as fine-grained as the the groundmass in sample 17, indicating incomplete quenching of the block…
19	19-AL-14-12-10-11	30.1676	-115.564	Sample 19	NFBB	Kl-m	basaltic andesite	Lavas of mafic composition, with associated flow breccias (Kl-m)	Basaltic andesite lava with brecciated base; sample collected from coherent interior.	A: Outcrop photo of basaltic andesite lava with a brecciated base, overlying the hyaloclastite breccia (sample 10). B: Photomicrograph (plane light) from the coherent interior of the basaltic andesite lava showing plagioclase microlites and lack of phencrysts. C-E: Total-alkalis vs silica diagram (C) of sample 19 in comparison to other lavas, lava domes, and block-and-ash-flow tuffs (triangles) a…
20	20-AL-14-12-10-12	30.1672	-115.568	Sample 20	NFBB	Kh-m	basaltic andesite	Sills and plugs of mafic composition (Kh-m)	Basaltic andesite sill: tabular coherent igneous body with sharp upper and lower contacts, concordant with bedding.	A: Outcrop photo of 4 m thick basaltic andesite sill, showing tabular sharp basal contact with hyaloclastite breccia. B: Photomicrograph (crossed polars) of basaltic andesite sill, showing sparse plagioclase and pyroxene phenocrysts in a microlitic plagioclase groundmass. C-E: Total-alkalis vs silica diagram (C) of sample 20 in comparison to other hypabyssal intrusions (crosses) and composition f…
86	86-AL-15-04-10-1	30.1684	-115.484	Sample 86	NFBB	Ku	dacite	Undifferentiated lavas/hypabyssal intrusions (Ku)	Altered dacite lava or hypabyssal intrusion.	A: Altered dacite lava or hypabyssal intrusion, forming a resistant peak. B: Photomicrograph in crossed polars showing relict mafic phenocrysts (likely hornblende) and plagioclase in a fine-grained groundmass. C-E: Total-alkalis vs silica diagram (C) of sample 86 in comparison to other undifferentiated rocks (circles) and hypabyssal intrusions (crosses). Black symbols are samples that we interpre…
87	87-AL-15-04-10-2	30.1701	-115.486	Sample 87	NFBB	Ki	dacite	Ignimbrites - non-marine, mostly welded (Ki)	Tuff of Protrero: Dacite welded ignimbrite, distinctive for pink color (others are white to gray) as well as having higher crystal content (~15%) relative to the other ignimbrites (generally <5%).	A: Photomicrograph in plain light, showing remnant and highly altered feldspar phenocrysts within a fine-grained groundmass. B-D: Total-alkalis vs silica diagram (B) of sample 87 (dacite welded ignimbrite) in comparison to other ignimbrites, volcaniclastic rocks, hypabyssal intrusions, and compositional fields of lavas, lava domes, block-and-ash-flow tuffs (B&AFTs), and plutonic rocks. Black symb…
92	92-AL-15-04-10-7	30.1776	-115.485	Sample 92	NFBB	Ki		Ignimbrites - non-marine, mostly welded (Ki)	Rhyolite welded ignimbrite in a section of fluvially-reworked tuffs. Forms a grey, resistant outcrop approximately 5-8 m thick.	A: Outcrop photo of rhyolite ignimbrite. B: Photomicrographs in plane light (L) and crossed polars (R) of a flattened pumice (fiamme) in tuff matrix with minor volcanic rock fragments, from base of the ignimbrite. Silicification of the pumice is obvious in crossed polars. C: Photomicrographs in plane light (L) and crossed polars (R) of flattened pumice (fiamme) from the middle of the ignimbrite s…
94 (and 216)	94-AL-15-04-10-9	30.1806	-115.485	Sample 94 and 216	NFBB	Ki	94 & 216: rhyolite	Ignimbrites - non-marine, mostly welded (Ki)	Rhyolite welded ignimbrite in a section of non-marine volcaniclastic rocks. Forms a cliff (50-60 m thick), with a vitrophyric base (5-8 m thick). Sample 94 is from the upper part of the ignimbrite and sample 216 is from the base of the ignimbrite.	A: Outcrop panorama of massive welded ignimbrite and the two sampled sites (sample 216 is the basal vitrophyre and sample 94 is at the top). B: Close-up outcrop photo of the densely welded basal vitrophyre (sample 216), visible plagioclase grains. C: Photomicrograph (plane light) of the upper part of the ignimbrite (sample 94) showing well-preserved welding of glass shards and pumice shreds. Crys…
96 (A,B)	96-AL-15-04-11-1	30.1882	-115.457	Sample 96A and 96B	NFBB	Kplm-f/Kplm-i	96A: tonalite (60 wt.% siO2); 96B: leucocratic intrusion - granitic (75 wt.% siO2)	Los Martires pluton - tonalite (Kplm-i) and leucocratic intrusions	96A: MIxed hybrid tonalite of the Los Martires pluton (Plag 55%, Qtz 25%, Hbld 10%, Cpx 5%, Oxides 5%) displaying strong disequilibrium textures in Hbld and Cpx. 96B: Leucocratic rocks of the Los Martires pluton (Plag 40%, K-spar 15-20%, Qtz 40%, Hbld <3%, Oxides <<1%).	A: Outcrop photo of leucocratic rocks intruding a mixed hybrid tonalite (Kplm-i) of the Los Martires pluton (backpack for scale). Intrusion is aproximately 0.5 m wide. B: Photomicrographs in plane light (L) and crossed polars (R) of a mixed hybrid tonalite with intermediate composition (60 wt.% SiO2). Mafic minerals (hbld and cpx) display strong disequilbrium textures (embayments and heavily siev…
97	97-AL-15-04-11-2	30.1881	-115.457	Sample 97	NFBB	Kplm-f	leucocratic intrusion - granitic (76 wt.% siO2)	Los Martires pluton - leucocratic intrusions	Leucocratic rocks of the Los Martires pluton (Plag 30%, K-spar 15-20%, Qtz 50%, Hbld <1%, Oxides <<1%).	A: Outcrop photo of a leucocratic intrusion of the Los Martires pluton. Intrusion is about 10 m wide and trends NW-SE. Multiple m-scale intrusions nearby, also trending NW-SE (see map). B: Photomicrograph of the leucocratic rocks in plane light (L) and crossed polars (R). Feldspars include albite and K-spar and appear darker in plane light. C-E: Total-alkalis vs silica diagram (C) of sample 97 in…
98	98-AL-15-04-11-3	30.1908	-115.487	Sample 98	NFBB	Kh-s	rhyolite	Sills and plugs of silicic composition (Kh-s)	Rhyolite hypabyssal intrusion.	A: Photomicrograph (crossed polars) of the rhyolite hypabyssal intrusion, showing small plagioclase phenocrysts set in a microcrystalline quartzofeldspathic groundmass. B-D: Total-alkalis vs silica diagram (B) of sample 98 in comparison to other hypabyssal intrusions (crosses). Black symbols are samples that we interpret to represent liquid compositions and gray symbols are samples that we interp…
103	103-AL-15-04-11-8	30.1879	-115.479	Sample 103	NFBB	Kplm-f and Kplm-ma	103: tonalite (67 wt.% siO2); 104: two-pyroxene gabbro (51 wt.% siO2)	Los Martires pluton - tonalite (Kplm-f) and two-pyroxene gabbro (Kplm-ma)	Tonalite (103: Plag 55%, Qtz 35%, Hbld 5%, K-spar <5%,Titanite <1%) and two-pyroxene gabbro (104: Plag 55%, Opx 15%, Cpx 20%, Hbld <5%, Bio <3%, Oxides <3%) of the Los Mar	A: Outcrop showing magma mingling between the tonalite and two-pyroxene gabbro. Field books for scale. B: Outcrop photo of magma mingling textures between the tonalite (Kplm-f; sample 103) and two-pyroxene gabbro (Kplm-ma; sample 104). Hammer for scale. C: Photomicrographs of the tonalite in plane light (L) and crossed polars (R). D: Photomicrographs of the two-pyroxene gabbro in plane light (L) …
104	104-AL-15-04-11-9	30.1876	-115.479	Sample 104	NFBB	Kplm-f and Kplm-ma	103: tonalite (67 wt.% siO2); 104: two-pyroxene gabbro (51 wt.% siO2)	Los Martires pluton - tonalite (Kplm-f) and two-pyroxene gabbro (Kplm-ma)	Tonalite (103: Plag 55%, Qtz 35%, Hbld 5%, K-spar <5%,Titanite <1%) and two-pyroxene gabbro (104: Plag 55%, Opx 15%, Cpx 20%, Hbld <5%, Bio <3%, Oxides <3%) of the Los Martires pluton.	A: Outcrop showing magma mingling between the tonalite and two-pyroxene gabbro. Field books for scale. B: Outcrop photo of magma mingling textures between the tonalite (Kplm-f; sample 103) and two-pyroxene gabbro (Kplm-ma; sample 104). Hammer for scale. C: Photomicrographs of the tonalite in plane light (L) and crossed polars (R). D: Photomicrographs of the two-pyroxene gabbro in plane light (L) …
105	105-AL-15-04-11-10	30.1871	-115.478	Sample 105	NFBB	Kplm-f	leucocratic intrusion - granitic (76 wt.% siO2)	Los Martires pluton - leucocratic intrusions	Leucocratic rocks of the Los Martires pluton (Altered feldspars 50%, Qtz 45%, Hbld <5%, <1% Titanite).	A-B: Outcrop photo of leucocratic rocks intruding undifferentiated rocks (Ku) in the roof of the pluton. C: Photomicrograph of leucocratic rocks (plane light) showing altered feldspars (likely albite and K-spar) and quartz. D-F:Total-alkalis vs silica diagram (D) of sample 105 in comparison to other plutonic rocks (squares) and hypabyssal intrusions (crosses). Black symbols are samples that we in…
215	215-AL-16-03-14-2	30.1886	-115.472	Sample 215	NFBB	Kplm-i	tonalite (61 wt.% siO2)	Los Martires pluton - tonalite (Kplm-i)	Tonalite of the Los Martires pluton (Plag 55%, Hbld 20%, Qtz 15%, Bio 10%), with intermediate composition.	A: Outcrop photo of the Los Martires tonalite (Kplm-i). B: Close-up photo of the tonalite. C: Photomicrographs in plane light (L) and crossed polars (R) displaying the tonalite of the Los Martires pluton. D-F: Total-alkalis vs silica diagram (D) of sample 215 in comparison to other plutonic rocks (squares) and hypabyssal intrusions (crosses). Black symbols are samples that we interpret to represe…
216 (and 94)	216-AL-16-03-15-1	30.1819	-115.485	See Sample 94 and 216	NFBB	Ki		Ignimbrites - non-marine, mostly welded (Ki)	Rhyolite welded ignimbrite in a section of nonmarine volcaniclastic rocks. Forms a cliff (50-60 m thick), with a vitrophyric base (5-8 m thick). Sample 94 is from the upper part of the ignimbrite and sample 216 is from the base of the ignimbrite.	A: Outcrop panorama of massive welded ignimbrite and the two sampled sites (sample 216 is the basal vitrophyre and sample 94 is at the top). B: Close-up outcrop photo of the densely welded basal vitrophyre (sample 216), visible plagioclase grains. C: Photomicrograph (plane light) of the upper part of the ignimbrite (sample 94) showing well-preserved welding of glass shards and pumice shreds. Crys…
218	218-AL-16-03-15-3	30.1722	-115.485	Sample 218	NFBB	no label - dike	basalt	Dikes of mafic composition	Dike of basalt composition cross-cutting fluvially reworked tuffs, with host-rock clasts.	A: Outcrop photo showing both angular and rounded edges of clast (outlined) within the dike. B: Photomicrograph in plane light (top) and crossed polars (bottom) showing plagioclase phenocrysts (sub to euhedral) set in a matrix of hornblende (anhedral), plagioclase microlites, and oxides. C-E: Total-alkalis vs silica diagram (C) of sample 218 in comparison to other hypabyssal intrusions (crosses) …
221	221-AL-16-03-15-6	30.1698	-115.486	Sample 221	NFBB	Ki	rhyolite	Ignimbrites - non-marine, mostly welded (Ki)	Slightly welded and lithic-poor tuff of Protrero.	A: Photomicrograph in plane light (L) and crossed polars (R) showing slightly welded and lithic-poor tuff of Protrero. B-D: Total-alkalis vs silica diagram (B) of rhyolite ignimbrite (sample 221) in comparison to other ignimbrites, volcaniclastics, hypabyssal intrusions, and compositional fields for lavas, lava domes, block-and-ash-flow tuffs, and plutonic rocks. Black symbols are samples that we…
222 (A,B)	222-AL-16-03-15-7	30.1673	-115.483	Sample 222A and 222B	NFBB	Kplm-f	222A: hornblende cumulate (56 wt.% siO2); 222B: tonalite (69.5 wt.% siO2)	Los Martires pluton - tonalite (Kplm-f) with abundant mafic enclaves	Felsic tonalite of the Los Martires pluton (222B: Plag 50%, Qtz 40%, Hbld <10%, Oxides <1%) with abundant hornblende-bearing, fine-grained mafic enclaves (222A: Plag 60%, Hbld 40%, Oxides <1%).	A: Outcrop photo showing the felsic tonalite (lighter unit) of the Los Martires pluton mingled with abundant fine-grained, mafic enclaves (darker unit). Person for scale. B: Close-up outcrop photos of the felsic tonalite (lighter unit) with mafic enclaves (darker unit). The abundant mafic enclaves make up >15% of the outcrop exposure. Pen for scale. C: Close-up photo of an enclave. Enclaves commo…
223	223-AL-16-03-15-8	30.1686	-115.483	Sample 223	NFBB	Kplm-f	tonalite (72 wt.% siO2)	Los Martires pluton - tonalite (Kplm-f)	Tonalite of the Los Martires pluton (Plag 55%, Qtz 40%, Hbld <5%, Titanite 1%, Oxides <1%).	A: Outcrop photo of felsic tonalite of the Los Martires pluton. B: Photomicrographs in plane light (top) and crossed polars (bottom) displaying tonalite of the Los Martires pluton. C - E: Total-alkalis vs silica diagram (C) of sample 223 in comparison to other plutonic rocks (squares) and hypabyssal intrusions (crosses). Black symbols are samples that we interpret to represent liquid compositions…
224 (A,B)	224-AL-16-03-16-2	30.1868	-115.479	Sample 224A and 224B	NFBB	Kplm-ma & Ku	224A: two pyroxene gabbro (52 wt.% siO2); 224B: basaltic andesite	Los Martires pluton - two-pyroxene gabbro (Kplm-ma) and undifferentiated lavas/hypabyssal intrusions (Ku)	Undifferentiated rocks (Ku; 224A) with two-pyroxene gabbro (224B: Plag 55%, Hbld 10%, Bio 10%, Opx <10%, Qtz <5%, Cpx <5%, Olivine <3%, Oxides <3%), tonalite (Kplm-i/f), and leucocratic rocks (Kplm-f) of the Los Martires pluton.	A: Outcrop photo of the units at outcrop 224 (hammer for scale), and a graphic with the interpreted timing of magma emplacement. B-C: Photomicrographs in plane light (L) and crossed polars (R) displaying the two-pyroxene gabbro (sample 224A) of the Los Martires pluton (schematic unit 2). Quartz and biotite are anhedral and interstitial. Photomicrographs of olivine (C) in plane light (top) and cro…
225	225-AL-16-03-16-3	30.182	-115.413	Sample 225	NFBB	Kplm-f	tonalite (68 wt.% siO2)	Los Martires pluton - tonalite (Kplm-f)	Main phase tonalite of the Los Martires pluton (Plag 45%, Qtz 40%, Bio 10%, Hbld 5%) with abundant fine-grained mafic to intermediate enclaves.	A-C: Outcrop photos of the main phase tonalite of the Los Martires pluton, with abundant cm-scale fine-grained mafic to intermediate enclaves. Cacti (photo A) and field book (photos B, C) for scale. D: Photomicrographs in plane light (L) and crossed polars (R) displaying the main phase tonalite of the Los Martires pluton. E-G: Total-alkalis vs silica diagram (E) of sample 225 in comparison to oth…
241	241-AL-16-03-20-7	30.1129	-115.355	Sample 241	NFBB	Kplm-i	tonalite (59 wt.% siO2)	Los Martires pluton - mingled zone of tonalite and hornblende gabbro (Kplm-i)	Tonalite (241: Plag 55%, Hbld 25%, Qtz 20%) mingled with hornblende gabbro within the Los Martires pluton.	A-C: Various outcrop photos displaying magma mingling textures (i.e., mafic enclaves and hornblende-rich zones) within the Los Martires pluton. D: Photomicrographs in plane light (top) and cross polars (bottom) of a mingled tonalite within the Los Martires pluton. E-G: Total-alkalis vs silica diagram (E) of the mingled tonalite (sample 241) in comparison to other plutonic rocks (squares) and hypa…
102	102-AL-15-04-11-7	30.1906	-115.49	Sample 102	NFBB	Kvf-s	rhyolite	Fluvially reworked tuffs with dominantly silicic clasts (Kvf-s)	Very thin- to thick-bedded fluvially-reworked silicic tuff, very fine-grained to coarse-grained.	A: Outcrop photo showing medium- to thick-bedded resistant coarse-grained tuff and lapilli tuff alternating with very thin-bedded fine-grained tuff (dark-colored and recessive). B-D: Total-alkalis vs silica diagram (B) of sample 102 in comparison to other volcaniclastic rocks, ignimbrites, hypabyssal intrusions, and compositional fields for lavas, lava domes, block-and-ash-flow tuffs (B&AFTs) and…
242	242-AL-16-03-20-8	30.106	-115.361	Sample 242	NFBB	Kav	rhyolite	Altered volcanic rocks (Kav)	Altered lavas or hypabyssal intrusions of rhyolite composition.	A: Photomicrographs in plane light (L) and crossed polars (R) of the lava or hypabyssal intrusion showing plagioclase and altered mafic (likely hornblende) phenocrysts, sometimes occuring as glomerocrysts. Groundmass shows evidence of flow-banding. B-D: Total-alkalis vs silica diagram (B) of sample 242 in comparison to other undifferentiated rocks (circles), hypabyssal intrusions (crosses), and c…
85 (A,B)	85-AL-15-04-09-3	30.1862	-115.479	Sample 85A and 85B	NFBB	Ki, Kh-m, Kplm-f	85A: no chemistry; 85B: basalt	Ignimbrites - nonmarine, mostly welded (Ki); with mafic- to mafic-intermediate hypabyssal intrusions (Kh-m); and luecocratic intrusions from the Los Martires pluton (Kplm-f)	Welded ignimbrite in a section of nonmarine volcaniclastic rocks (Ki; 85A). This sample is close to the Los Martires pluton so it is altered and does not preserve microscopic welding textures. Basalt to basalt andesite sill (Kh-m; 85B) approximately 1 m thick, intrudes the welded ignimbrite. Basalt sill is aligned parallel to eutaxitic foliation in the ignimbrite. Basalt sill is intruded by the l…	A: Outcrop photo with a corresponding schematic showing the ignimbrite (85A) intruded by a basalt sill (85B), and lfelsic intrusions of leucocratic rocks from the Los Martires pluton, which intrude the basalt sill. B: Outcrop photo of the basalt sill (85B) aligned parallel to eutaxitic foliation in the welded ignimbrite (85A). Sill is 1 m thick and intrudes sample 85A. Leucocratic intrusions from…
1	1-AL-14-12-09-1	30.1827	-115.549	Sample 1	NFBB	Kvt-s		Marine tuff turbidites with dominantly silicic clasts (Kvt-s).	Alternation of silicic subaqueous fallout, tuff tubidites, and fire-fountain deposits with ameboid clasts. Thin- to thick-bedded.	A: Outcrop photo of interstratified subaqueous fallout, tuff tubidites, and fire-fountain deposits (50 lb dog for scale). B: Outcrop photo closeup of image A. C: Outcrop photo of a bed of amoeboid clasts (subaqueous fire-fountain deposits) - pen for scale in upper right corner. D: Photomicrographs of amoeboid clasts in a tuff matrix, in plane light (top) and crossed polars (bottom). E: Photomicro…
2	2-AL-14-12-09-2	30.181	-115.549	Sample 2	NFBB	Kda		Debris avalanche deposit (Kda)	Mafic clast from the debris avalanche deposit.	A: Outcrop photo of volcanic clast in debris avalanche deposit. B: Photomicrographs of volcanic clast in debris avalanche deposit in plane light (top) and crossed polars (bottom), showing fresh plagioclase phenocrysts in the clast, and smaller volcanic rock fragments in the matrix.
3	3-AL-14-12-09-3	30.1806	-115.55	Sample 3	NFBB	Kda		Debris avalanche deposit (Kda)	Sample from the fine-grained matrix of the debris avalanche deposit.	A: Outcrop photo of tuffaceous sandstone matrix of the debris avalanche deposit, showing crude stratification. B: Photomicrographs of the tuffaceous sandstone matrix of the debris avalanche deposit, in plane light, showing volcanic lithic clasts and shell fragments.
5	5-AL-14-12-09-5	30.18	-115.55	Sample 5	NFBB	Kda		Debris avalanche deposit (Kda)	Sample from tuffaceous sandstone matrix of the debris avalanche deposit.	A: Outcrop photo of tuffaceous sandstone matrix of the debris avalanche deposit. B: Photomicrograph (plane light) of tuffaceous sandstone matrix of the debris avalanche deposit.
6	6-AL-14-12-09-6	30.1778	-115.551	Sample 6	NFBB	Kvt-s		Marine tuff turbidites with dominantly silicic clasts (Kvt-s)	White- to tan-colored silicic lapilli tuff and tuff in graded beds approximately 2 m thick, with scoured bases; basal part massive and poorly sorted, passing up into finer-grained laminated tuff with better sorting. Interpreted to be eruption-fed turbidity current deposits.	A: Outcrop photo of a graded bed of silicic lapilli tuff and tuff; base is massive lapilli tuff, passing upward into laminated tuff. B: Outcrop photo of scour at the base of a graded silicic lapilli tuff to tuff bed, truncating laminations in the underlying bed. C: Outcrop photo close-up of silicic pumice lapilli tuff at the base of a graded bed. Photo displays pumices (white) and weathered out p…
7	7-AL-14-12-09-7	30.1778	-115.551	Sample 7	NFBB	Kvt-s		Marine tuff turbidites with dominantly silicic clasts (Kvt-s)	White- to tan-colored silicic bedded tuff in thin beds with lamination (sample 6) overlain by lapilli tuff with erosional base.	A: Outcrop photo of silicic bedded tuff in thin beds with lamination. Overlying sample 6 and overlain by lapilli tuff with erosional base. B: Photomicrograph (plane light) of silicic tuff.
8	8-AL-14-12-09-8	30.1745	-115.553	Sample 8	NFBB	Kvt-s		Marine tuff turbidites with dominantly silicic clasts (Kvt-s)	White- to tan-colored thin-bedded graded silicic tuff and lapilli tuff beds, inferred to be deposits of low-density turbidity currents.	A: Outcrop photo of thin-bedded graded silicic tuff beds, showing tabular bedding (person for scale). B: Outcrop photo of thin-bedded tuffs overlain by a graded lapilli tuff to tuff with weak basal scour, in turn overlain by lapilli tuff (pen for scale). C: Photomicrograph of silicic lapilli tuff in plane light, showing abundant pumice shreds.
9	9-AL-14-12-09-1	30.1673	-115.566	Sample 9A and 9B	NFBB	Kvt-m		Marine tuff turbidites with dominantly mafic to intermediate clasts (Kvt-m)	Green-colored mafic lapilli tuff and tuff in graded beds 1 -1.5 m thick. Some beds are massive and some have laminations in their upper parts.	A: Outcrop photo of green-colored mafic lapilli tuff and tuff, showing two graded beds (hammer for scale). B: Photomicrograph (plane light) of laminated mafic tuff from the upper part (sample 9B) of a graded bed. C: Photomicrographs of mafic lapilli tuff at the base of a graded bed (sample 9A), in plane light (top) and crossed polars (bottom). Outlines of lapilli are faint. Abundant euhedral plag…
10	10-AL-14-12-09-2	30.1673	-115.566	Sample 10	NFBB	Kh-m		Sills and plugs of mafic composition (Kh-m)	Red-weathering tabular mafic to mafic-intermediate sill (8 m thick) with sharp upper and lower contacts, concordant with stratigraphy.	A: Outcrop photo of red-weathering mafic to mafic-intermediate sill, showing sharp basal intrusive contact with green hyaloclastite breccia. B: Photomicrograph of mafic to mafic-intermediate sill (plane light) showing plagioclase microlites in groundmass and sparse plagioclase phenocrysts.
11	11-AL-14-12-09-3	30.1734	-115.555	Sample 11	NFBB	Kvt-m		Marine tuff turbidites with dominantly mafic to intermediate clasts (Kvt-m)	Gradational contact between underlying marine tuff turbidites with dominantly silicic clasts (Kvt-s) of phase 1, and overlying marine tuff turbidites with dominantly mafic to intermediate clasts (Kvt-m) of phase 2.	A: Outcrop photo of gradational contact between underlying marine tuff turbidites with dominantly silicic clasts (Kvt-s) of phase 1, and overlying marine tuff turbidites with dominantly mafic to intermediate clasts (Kvt-m) of phase 2. Showing interbedded green-coloured mafic tuff turbidites and white-coloured silicic tuff turbidites, in thin tabular beds (person for scale). B: Photomicrograph of …
12	12-AL-14-12-09-4	30.1733	-115.555	Sample 12 and 13	NFBB	Kh-m	basaltic andesite	Sills and plugs of mafic composition (Kh-m)	Basaltic andesite sill, approximately 25 m thick, that intrudes marine tuff turbidites.	A: Outcrop panorama of sill, with white thin-bedded silicic tuff beds below and greenish brown thin-bedded mafic tuffs above. These in turn are overlain by a mafic lava (on skyline). Overlying beds are disturbed by the intrusion. Sample 12 collected on NW side of canyon (shown), sample 13 collected on SE side of canyon (not shown). B: Photomicrograph of sample 12, in plane light (L) and crossed p…
16	16-AL-14-12-10-8	30.1694	-115.56	Sample 16	NFBB	Kvt-m		Marine tuff turbidites with dominantly mafic to intermediate clasts (Kvt-m)	Thin-bedded laminated mafic tuff turbidite.	A: Outcrop photo of thin-bedded mafic tuff turbidite; coarser beds weather white. Also shown is a 1.5 m thick mafic sill (resistant layer). B: Photomicrograph of mafic tuff turbidite (plane light) showing fine-grain size and laminations.
17	17-AL-14-12-10-9	30.1684	-115.562	Sample 17	NFBB	Khc-m		Hyaloclastite breccias, mafic to intermediate composiiton (Khc-m)	Unsorted breccias of blocky polyhedral glass fragments and partial or whole pillows or pillow-like objects, in thick structure-less beds. This sample was taken from a very large block that fell off the cliff and has been polished in the arroyo.	A: Outcrop photo of hyaloclastite breccia, consisting of unsorted blocky polyhedral glass fragments and partial or whole pillows or pillow-like objects, all of the same composition, in thick structureless beds. This forms the carapace on coherent lavas in submarine environments, and the carapace is commonly intruded by pseudopillow in various degrees of disruption as shown here. B: Outcrop photo …
83	83-AL-15-04-09-1	30.1853	-115.478	Sample 83	NFBB	Ki		Ignimbrites - non-marine, mostly welded.	Welded ignimbrite in a section of non-marine volcaniclastic rocks. This sample is close to the Los Martires pluton, so it is altered and does not preserve microscopic welding textures.	A: Outcrop photo of welded ignimbrite showing eutaxitic foliation (fiamme). B: Photomicrographs in plane light (L) and crossed polars (R), showing that this ignimbrite is too altered to preserve microscopic welding texture, due to its proximity to the Los Martires pluton.
84	84-AL-15-04-09-2	30.1842	-115.48	Sample 84	NFBB	Kvdf-s		Volcanic debris flow deposits with dominantly silicic clasts - non-marine	Volcanic debris flow deposit with dominantly silicic clasts but polylithic, massive to crudely stratified nonsorted deposit. This sample is altered and close to the contact with the Los Martires pluton.	A: Outcrop photo of volcanic debris flow deposit with dominantly silicic clasts but polylithic with white and gray clasts with variable plagioclase content, massive and nonsorted. This sample is close to the Los Martires pluton, so it is altered (no photomicrograph shown).
91	91-AL-15-04-10-6	30.1723	-115.485	Sample 91	NFBB	Kvf-s		Fluvially reworked tuffs with dominantly silicic clasts (Kvf-s)	White- to tan-colored thin- to thick-bedded (<10 to 50 cm), poorly sorted silicic tuffs containing volcanic lithics (<cm), inferred to be fluvially reworked tuff.	A: Outcrop photo of fluvially-reworked tuff, showing thin to medium beds. Hammer for scale. B: Photomicrographs of fluvially-reworked tuff in plane light (L), and crossed polars (R), showing minor volcanic rock fragments in a groundmass inferred to be altered volcanic glass.
93	93-AL-15-04-10-8	30.1785	-115.485	Sample 93	NFBB	Kh-m		Sills and plugs of mafic composition (Kh-m)	Sill of inferred mafic composition, intruding fluvially reworked tuffs - approximately 2 m thick.	A: Outcrop photo of the sill of inferred mafic composition (~2 m thick), intruding thin-bedded fluvially reworked tuffs. Sample 92 was collected from the base of the ignimbrite (upper unit in photo). B: Close-up of the sill showing its darker outcrop color. C: Photomicrographs in plane light (L) and crossed polars (R) of the sill, showing altered plagioclase phenocrysts and fewer cpx phenocrysts …
99	99-AL-15-04-11-4	30.1885	-115.488	Site 99	NFBB	Kvdf-s		Volcanic debris flow deposits with dominantly silicic clasts.	Volcanic debris flow deposit forming a cliff (20-25 m) in a section of fluvially-reworked tuffs.	A: Outcrop photo of the volcanic debris flow deposit, showing dominantly white or red weathering clasts and minor gray clasts in an unsorted matrix, with no stratification.
214	214-AL-16-03-14-1	30.1953	-115.473	Sample 214	NFBB	Kplm-f and Kplm-m		Los Martires pluton - tonalite (Kplm-f) and hornblende gabbro (Kplm-m)	Tonalite and hornblende gabbro of the Los Martires pluton. Exposure shows a qtz-rich, hbld-poor felsic tonalite (Kplm-f: Qtz 55%, Plag 35%, Hbld <10%), which intrudes and mingles with a plag-rich hornblende gabbro (Kplm-m: Plag 70-75%, Hbld 15-20%, Qtz <10%).	A: Outcrop photo showing the intrusion of a felsic tonalite (Kplm-f) into a hornblende gabbro (Kplm-m) of the Los Martires pluton. B: Outcrop photo displaying ductile edges of the hornblende gabbro, suggesting magma mingling occuring in some areas. Hammer for scale. C: Outcrop photo displaying ductile and brittle features between the hornblende gabbro (Kplm-m) and tonalite (Kplm-f). D: Photomicro…
219	219-AL-16-03-15-4	30.1734	-115.488	Sample 219	NFBB	Ki		Ignimbrites - non-marine, mostly welded	Tuff of Protrero: Rhyolite welded ignimbrite, distinctive for pink color (others are white to gray), as well as having higher crystal content (~15%) relative to the other ignimbrites (generally <5%).	A: Outcrop photo showing the rhyolite welded ignimbrite forming a cliff. B: Close-up photo showing highly compacted pumices and plagioclase phenocrysts. C: Photomicrograph in plane light (L) and crossed polars (R) showing eutaxitic foliation (fiamme) and abundant plagioclase crystals.
246	246-AL-16-03-20-12	30.1021	-115.345	Sample 246	NFBB	Kplm-ma	two pyroxene gabbro (45 wt.% siO2)	Los Martires pluton - two-pyroxene gabbro (Kplm-ma)	Two-pyroxene gabbro of the Los Martires pluton (Plag 55%, Cpx 15%, Opx 10%, Bio 5%, Olivine <5%, Hbld <5%, Oxides <5%).	A: Outcrop photo of the two-pyroxene gabbro of the Los Martires pluton. B: Photomicrographs of the two-pyroxene gabbro of the Los Martires pluton in plane light (top photos) and crossed polars (bottom photos). Sample displays crystal clots of olivine. Olivine confirmed by EMPA analysis. C-E: Total-alkalis vs silica diagram (C) of sample 246 in comparison to other plutonic rocks (squares) and hypa…
21 (A,B)	21-AL-14-12-12-1	29.9713	-115.234	Sample 21A and 21B	SVBB	Kpsf-f	21A: plagioclase cumulate (66 wt.% siO2); 21B: hornblende gabbro (58 wt.% siO2)	San Fernando pluton - tonalite (Kpsf-f)	San Fernando tonalite (21A: Plag 60%, Qtz 20%, Hbld 15%, Oxides 5%) with fine-grained intermediate enclaves (21B: Plag 65%, Hbld 30%, Oxides 5%), and coarser grained hornblende cumulates. Trace element chemistry indicates the tonalite (21A) is a plagioclase cumulate.	A-B: Outcrop photos displaying felsic tonalite phase (Kpsf-f) of the San Fernando pluton mingled with abundant hornblende-bearing intermediate enclaves (Kpsf-i). Hammer (A) and pen (B) for scale. C: Close-up outcrop photo of plagioclase and hornblende rich zones, as well as miarolitic cavities within the tonalite. D: Close-up outcrop photo of coarse-grained hornblende cumulates within the felsic …
22	22-AL-14-12-12-2	29.9713	-115.245	Sample 22	SVBB	Kpsf-ma	two pyroxene gabbro (53 wt.% siO2)	San Fernando Pluton - two-pyroxene gabbro (Kpsf-ma)	Two-pyroxene gabbro of the San Fernando pluton (Plag 65%, Opx 10-15%, Cpx 5-10%, Hbld <5%, Bio <5%, Oxides <5%).	A: Outcrop photo of the two-pyroxene gabbro (hammer for scale). B: Photomicrographs of the two-pyroxene gabbro in plane light (top) and crossed polars (bottom). C-E: Total-alkalis vs silica diagram (C) of sample 22 in comparison to other plutonic rocks (squares) and hypabyssal intrusions (crosses). Black symbols are samples that we interpret to represent liquid compositions and gray symbols are s…
23	23-AL-14-12-12-3	29.9691	-115.247	Sample 23	SVBB	Kpsf-i	tonalite (61 wt.% siO2)	San Fernando pluton - tonalite (Kpsf-i)	Mixed hybrid tonalite (complex mixture of tonalite and gabbro) of the San Fernando pluton (Plag 50%, Qtz 30%, Cpx 10%, Hbld <5%, Oxides 5%, trace zircons).	A: Outcrop photo of the mixed hybrid tonalite (complex mixture of tonalite and gabbro) of the San Fernando pluton. B: Photomicrographs of the mixed hybrid tonalite in plane light (top) and crossed polars (bottom). Clinopyroxene (cpx) grains display disequilibrium textures (sieved and embayments). Electron microprobe analysis indicates that clinopyroxene is diopside and has Mg#82-85. C-E:Total-alk…
24	24-AL-14-12-13-1	29.8878	-115.372	Sample 24	SVBB	Kh-i	andesite	Sills and plugs of intermediate composition (Kh-i)	Andesite sill, same body as sample 25 (see description).	A: Outcrop photo of 18 m thick sill exposed on north side of the San Fernando canyon. B: Close-up photo of sill. C: Photomicrographs in plane light (top) and crossed polars (bottom) showing sparse plagioclase phenocrysts in a devitirified groundmass (texture outlined). D-F: Total-alkalis vs silica diagram (D) of sample 24 in comparison to other hypabyssal intrusions (crosses). Black symbols are s…
25	25-AL-14-12-13-2	29.886	-115.367	Sample 25	SVBB	Kh-i	andesite	Sills and plugs of intermediate composition (Kh-i)	Andesitic hypabyssal intrusion, forming a sill between mafic tuff turbidites below (Kvt-m) and volcanic debris flow deposits above (Kvdf). This body was also sampled at localities 24, 116 and 122. The sill is ca. 80 m thick, and in places appears to be a composite of two or more sills. At the locality of sample 25, flow banding and felsic xenoliths up to 10 cm are present, and the upper ca. 20 m …	A: Panorama, showing the layering in the sheeted sill complex in photo background, and position of samples 24, 25, 116 and 122. Sample 25 was taken from the upper sill unit, samples 24, 116, and 122 were taken from the lower sill unit. B: Outcrop photo showing ca. 150 m thick andesite hypabyssal intrusion. Likely a composite of both the upper and lower sill unit. C: Outcrop photo showing columnar…
26 (A,B)	26-AL-14-12-13-3	29.8891	-115.366	Sample 26A and 26B	SVBB	Kvt-m	26A: basaltic trachyandesite; 26B: andesite	Marine tuff turbidites with dominantly mafic to intermediate clasts (Kvt-m)	Alteration of tuff and lapilli tuff beds, thin- to thick-bedded, with dominantly mafic to intermediate clasts.	A: Outcrop photo showing alternation of thin- to thick-bedded tuff (26A) and lapilli tuff (26B) beds. 50-lb dog (Lou) for scale. B: Close-up photos (image B and C) of a lapilli tuff bed (sample 26B) showing dark-colored mafic volcanic clasts. Hammer for scale (image C). D: Photomicrograph (plane light) displaying the fine-grained tuff (26A). E-H: Total-alkalis vs silica diagram (E) of samples 26A…
27	27-AL-14-12-13-4	29.8938	-115.364	Sample 27	SVBB	Kvt-s		Marine tuff turbidites with dominantly silicic clasts (Kvt-s).	Tuff beds, thin- to medium-bedded, with dominantly silicic clasts.	A: Outcrop photo of thin-bedded silicic tuff turbidites, showing tabular bedding and minor soft sediment deformation (arrows). B: Close-up of thin-bedded silicic tuff turbidites, showing lamination and rippling - Bouma C and D divisions (arrow). C: Photomicrographs (plane light) showing varying grain sizes atoutcrop 27. Tuff includes small euhedral plagioclase phenocrysts and felsic volcanic rock…
28 (A,B,C,D)	28-AL-14-12-13-05	29.896	-115.363	Sample 28A, 28B, 28C, 28D	SVBB	no label	28A: basaltic trachyandesite; 28B and 28C: basaltic andesite; 28D: andesite	Dikes of mafic to intermediate composition	Three closely-spaced dikes, 2 - 5 m wide. Dike 1: basaltic trachyandesite coarse-grained interior (28A) with a basaltic andesite fine-grained margin (28B). Dike 2: basaltic andesite (28C). Dike 3: andesite (28D) with amygdaloidal texture. All three dikes have chilled margins.	A: Outcrop photo of the three closely-spaced dikes cross-cutting marine tuff turbidites (Kvt-m). Dike 1 has a coarser diabase interior with a fine-grained margin. Dike 3 has a lighter grey matrix and is amygdaloidal. Person for scale. B: Outcrop photo, closeup of dike 1 which has a fine-grained basaltic andesite margin (sample 28B) and a coarse-grained interior that is basaltic trachyandesite in …
29	29-AL-14-12-14-1	29.8712	-115.371	Sample 29	SVBB	Kh-i	andesite	Sills and plugs of intermediate composition (Kh-i)	Andesite hypabyssal intrusion that intrudes mafic breccia (Kvdf-m). Outcrop transitions from a fine-grained peperitic margin to a coarse hypidiomorphic granular interior (Plag 55%, Hbld 25%, Cpx 10%, Qtz 5%, Oxides <5%). Coarse interior sampled.	A-B: Outcrop photo of the coarse-grained interior of the andesitic hypabyssal intrusion (A), backpack for scale. Close-up of hypidiomorphic granular texture within the coarse-grained interior (B), pen for scale. C: Photomicrographs in plane light (L) and crossed polars (R) showing hypidiomorphic granular texture of the coarse interior. Clinopyroxenes display disequilibrium textures (e.g., sieved …
30	30-AL-14-12-14-2	29.8695	-115.372	Sample 30	SVBB	Kbat-i	andesite (block)	Block & ash flow tuff of intermediate composition (Kbat-i)	Block from an andesite block-and-ash-flow tuff >70 m thick, base not exposed, overlain by tuff of San Fernando welded ignimbrite. Nonstratified, unsorted, monomict. Block size ranges from 10 cm to about 1 m.	A-B: Outcrop photos showing monomict andesitic blocks within the block-and-ash-flow tuff (image A and B). C: Photomicrograph in plane light of a sampled block from the block-and-ash-flow tuff, showing zoned and unzoned plagioclase and lesser hornblende. Zoned plagioclase cores are heavily altered. D-F: Total-alkalis vs silica diagram (D) of sample 30 in comparison to other lavas, lava domes, and …
31	31-AL-14-12-14-3	29.8694	-115.372	Sample 31	SVBB	no label - dike	dacite	Dikes of silicic composition	Dacite dike, ca. 5 m wide, with columnar joints along margins.	A-B: Outcrop photos showing the dacite dike cross-cutting the andesite block and ash flow tuff (Kbat-i, photo A). Columnar jointing occurs along the margin of the dacite dike (pen for scale - circled, photo B). C: Photomicrograph in plane light of the dacite dike, showing glomerocrysts of altered plag+hbld+oxides. Groundmass is also altered. D-F: Total-alkalis vs silica diagram (D) of sample 31 i…
32	32-AL-14-12-14-4	29.867	-115.371	Sample 32	SVBB	Ki-SF	dacite	Ignimbrite: tuff of San Fernando, mapped separately because of its thickness (Ki-SF)	Lower cooling unit of the dacite welded ignimbrite (tuff of San Fernando), which forms two cooling units of subequal thickness (total 350 m thick), with a 50 m thick section of dacite lavas (samples 33 and 34) in the middle of the ignimbrite. The lower cooling unit has a basal vitrophyre 2-3 m thick.	A: Tuff of San Fernando: view of the top part of the lower cooling unit (gray outcrop), the intervening dacite lavas (with flow banding), and the base of the upper cooling unit, which is orange likely due to vapor phase alteration. B: Outcrop photo showing lower cooling unit of the tuff of San Fernando welded dacite ignimbrite, which rests on the block-and-ash-flow tuff of sample 30. C: Close-up …
33 (A,B)	33-AL-14-12-14-05	29.865	-115.371	Sample 33A and 33B	SVBB	Kl-s	dacite	Lavas of silicic composition, with associated flow breccias (Kl-s)	Lower of two dacite lavas forming a 50 m thick section within the dacite tuff of San Fernando welded ignimbrite, locally flow banded. Lava is heterogeneous in phenocryst content on the outcrop scale; sample 33B has larger phenocrysts and glomerocrysts than 33A. Both samples are dacites.	A: Outcrop photo of 50 m thick dacite lava with flow banding. Sample 33A was collected within the flow banded zone of the outcrop (cryptocrystalline groundmass), sample 33B was collected from a region of the outcrop with greater glomerocryst %, and a microcrystalline groundmass (Photo B). B: Photomicrographs in plane light (top) and crossed polars (bottom) of dacite lava sample 33B, showing showi…
34	34-AL-14-12-14-6	29.8633	-115.37	Sample 34	SVBB	Kl-s	dacite	Lavas of silicic composition, with associated flow breccias (Kl-s)	Upper of two dacite lavas forming a 50 m thick section within the dacite tuff of San Fernando welded ignimbrite, with basal and upper flow breccias.	A - B: Outcrop photo of part of the basal flow breccia on the upper dacite lava. Xenolith rich, xenoliths display reaction rims (photo B). C: Photomicrographs in plane light (L) and crossed polar (R) of the upper dacite lava, with glomerocrysts of plagioclase, clinopyroxene and hornblende, similar to the lower dacite lava (sample 33). D-G: Total-alkalis vs silica diagram (D) of sample 34 in compa…
35 (A,B)	35-AL-14-12-14-07	29.8623	-115.37	Sample 35A and 35B	SVBB	Ki-SF	35A: rhyolite (whole-rock); 35B: dacite (pumice)	Ignimbrite: tuff of San Fernando, mapped separately because of its thickness (Ki-SF)	Upper cooling unit of the dacite welded ignimbrite (tuff of San Fernando) The upper cooling unit is less welded than the lower cooling unit (sample 32), and has more lithic fragments. Whole rock (35A) and pumice (35B) sampled.	A-B: Outcrop photo of the upper cooling unit of the dacite welded ignimbrite (tuff of San Fernando) with resistant light red/orange outcrops (photo A). Outcrop showing compaction fabric (photo B). C: Close-up of outcrop, showing less flattened pumices and more abundant lithics than present in the lower cooling unit (sample 32). D: Photomicrograph (plane light) of dacite tuff of San Fernando, show…
36	36-AL-14-12-14-8	29.8803	-115.374	Sample 36	SVBB	Ku	basalt	Undifferentiated lavas/hypabyssal intrusions (Ku)	Plagioclase-phyric basalt lava or hypabyssal intrusion with large plagioclase crystals up to 5 mm.	A: Outcrop photo of basalt lava or hypabyssal intrusion showing large plagioclase crystals >0.5 mm. B: Photomicrographs in plane light (top) and crossed polars (bottom) of basalt lava or hypabyssal intrusion, showing two size populations of plagioclase: a larger (>2 mm) zoned euhedral - subhedral population, and a smaller (<0.5 mm) population of laths. C-E: Total-alkalis vs silica diagram (C) of …
37	37-AL-14-12-14-9	29.8806	-115.374	Sample 37	SVBB	Ku	basalt	Undifferentiated lavas/hypabyssal intrusions (Ku)	Plagioclase-phyric basalt lava or hypabyssal intrusion.	A: Photomicrographs in plane light (L) and crossed polars (R) of basalt lava or hypabyssal intrusion, showing two size populations of plagioclase: a larger (up to 5 mm) zoned euhedral - subhedral population, and a smaller population (<0.5 mm) of laths. B-E: Total-alkalis vs silica diagram (B) of plagioclase-phyric basalt lava or hypabyssal intrusion in comparison to other undifferentiated rocks (…
38 (A,B)	38-AL-14-12-14-10	29.882	-115.375	Sample 38A and 38B	SVBB	Ku	basaltic andesite	Undifferentiated lavas/hypabyssal intrusions (Ku)	Basalt andesite lava or hypabyssal intrusion. Samples taken from a finer-grained (38A) and coarser-grained (38B) areas within the outcrop.	A: Outcrop photo of the basaltic andesite lava or hypabyssal intrusion. B: Photomicrographs in plane light of basaltic andesite lava or hypabyssal intrusion sample 38A (top) and 38B (bottom). Sample 38B is slightly coarser than 38A. C-E: Total-alkalis vs silica diagram (C) of basaltic andesite samples 38A and 38B in comparison to other undifferentiated rocks (circles) and hypabyssal intrusions (c…
41	41-AL-15-04-02-3	29.9482	-115.325	Sample 41	SVBB	Kpsf-m	hornblende gabbro (54 wt.% siO2)	San Fernando Pluton - hornblende gabbro (Kpsf-m)	Hornblende gabbro of the San Fernando pluton (Plag 80%, Hbld 15%, Oxides 5%, Bio <1%).	A: Outcrop photo of the hornblende gabbro (hammer for scale). Blotchy appearance is from variability in varnish. B: Close-up outcrop photo of hornblende gabbro (hammer for scale). C: Photomicrographs of hornblende gabbro in plane light (L) and crossed polars (R). Outcrop shows similar mineralogy to sample 40. D-F: Total-alkalis vs silica diagram (D) of sample 41 in comparison to other plutonic ro…
46	46-AL-15-04-02-08	29.9436	-115.326	Sample 46	SVBB	Kpsf-m	hornblende cumulate (51 wt.% siO2)	San Fernando Pluton - hornblende gabbro (Kpsf-m)	Hornblende gabbro of the San Fernando pluton (Plag 65%, Hbld 35%, Oxides <1%). Trace element chemistry indicates the gabbro is a hornblende cumulate.	A-B: Outcrop photos of the hornblende gabbro, showing a darker outcrop shade in comparison to the tonalite (field book for scale). Close-up of outcrop displays crystalline texture on weathered surface (photo B). C: Photomicrographs of hornblende gabbro (cumulate) in plane light (L) and crossed polars (R). D-G:Total-alkalis vs silica diagram (D) of sample 46 in comparison to other plutonic rocks (…
47 (A,B)	47-AL-15-04-02-1	29.9349	-115.324	Sample 47A and 47B	SVBB	Kpsf-f	47A: tonalite (64 wt.% siO2)	San Fernando pluton - tonalite (Kpsf-f)	Main phase tonalite of the San Fernando pluton (47A: Plag 55%, Qtz 30%, Hbld 10%, Bio 5%, Oxides <1%) with equant fine-grained mafic to intermediate enclaves (47B: Plag 55%, Hbld 35%, Bio 10%, Oxides <1%).	A-B: Outcrop photos of tonalite with abundant fine-grained mafic to intermediate enclaves. Hammer for scale (B). C: Photomicrographs of the main phase tonalite in plane light (L) and crossed polars (R). D: Photomicrographs of the fine-grained, hornblende-bearing mafic to intermediate enclaves in plane light (L) and crossed polars (R). E-H: Total-alkalis vs silica diagram (E) of main phase tonalit…
48	48-AL-15-04-03-02	29.9326	-115.326	Sample 48	SVBB	Kav	andesite	Altered volcanic rocks (Kav)	Altered andesite volcanic rock forming a roof pendant in the San Fernando pluton.	A: Outcrop photo of altered volcanic rock that forms a roof pendant in the San Fernando pluton, andesite in composition. B: Photomicrograph in plane light of altered volcanic rock (andesite in composition). C-F: Total-alkalis vs silica diagram (C) of sample 48 (volcanic roof pendant) in comparison to other xenoliths (dashes), hypabyssal intrusions (crosses), and compositional fields of lavas, lav…
60	60-AL-15-04-05-01	29.9164	-115.318	Sample 60	SVBB	Ku	dacite	Undifferentiated lavas/hypabyssal intrusions (Ku-s)	Undifferentiated lava or hypabyssal intrusion, of dacite composition.	A: Outcrop photo of showing resistant cliff (5 m thick) of dacite tabular body with scattered xenoliths, but no flow breccia. B: Close-up of dacite body showing scattered xenoliths (outlined) that are darker than the host. C: Photomicrographs in plane light (top) and crossed polars (bottom) of the dacite body showing plagioclase phenocrysts and smaller quartz and relict hornblende. D-F: Total-alk…
63 (A,B)	63-AL-15-04-05-4	29.9218	-115.311	Sample 63A and 63B	SVBB	Kpsf-f	63A: tonalite (66 wt.% siO2); 63B: hornblende gabbro (59 wt.% siO2)	San Fernando pluton - tonalite (Kpsf-f)	Main phase San Fernando tonalite (63A: Plag 40-45%, Qtz 40%, Hbld 15%, Oxides <3%) with abundant cm-sized (<10 cm), fine-grained intermediate enclaves (63B: Plag 55%, Hbld 35%, Qtz 5%, Oxides <5%).	A: Outcrop photo of the main phase tonalite of the San Fernando pluton (Kpsf-f), subvertically intruding undifferentiated lavas and hypabyssal intrusions (Ku). B: Outcrop photo of the main phase tonalite with abundant cm-sized intermediate enclaves (pen for scale). C: Photomicrograph of the main phase tonalite (63A) in plane light. D: Photomicrograph of the finer-grained intermediate enclave (63B…
64	64-AL-15-04-05-05	29.9208	-115.31	Sample 64	SVBB	Ku	andesite	Undifferentiated lavas/hypabyssal intrusions (Ku)	Andesite lava or hypabyssal intrusion, metamorphosed at the contact with the San Fernando pluton.	A: Photomicrographs in plane light (L) and crossed polars (R) showing plagioclase crystals and altered relict hornblende in a recrystallized groundmass. B-E: Total-alkalis vs silica diagram (B) of sample 64 (lava or hypabyssal intrusion) in comparison to other undifferentiated rocks (circles) and hypabyssal intrusions (crosses). Black symbols are samples that we interpret to represent liquid comp…
67B	67-AL-15-04-06-03	29.9135	-115.311	Sample 67	SVBB	Ku	basaltic andesite	Undifferentiated lavas/hypabyssal intrusions (Ku)	Basaltic andesite with plagioclase phenocrysts.	A: Outcrop photo of basaltic andesite. Sample bag (~ 30 cm) for scale. B: Photomicrographs in plane light (top) and crossed polars (bottom) showing plagioclase and clinopyroxene phenocrysts, some in glomerocrysts in a microcrystalline groundmass. C-F:Total-alkalis vs silica diagram (C) of sample 67 (lava or hypabyssal intrusion) in comparison to other undifferentiated rocks (circles) and hypabyss…
68 (A,B)	68-AL-15-04-06-04	29.917	-115.309	Sample 68A and 68B	SVBB	Kpsf-f/m	68A: leucocratic intrusion - granitic (71 wt.% siO2); 68B: hornblende gabbro (53 wt.% siO2)	San Fernando Pluton - hornblende gabbro (Kpsf-m) and leucocratic intrusions	Intrusions of leucocratic rocks (68A: Qtz 50%, Albite 20%, K-spar 15%, Hbld 10%, Titanite <1%) into marginal hornblende gabbro (68B: Plag 65%, Hbld 30%, Oxides 5%) of the San Fernando pluton.	A-B: Outcrop photo of the marginal hornblende gabbro (68B) and the intruding leucocratic rocks (68A) of the San Fernando pluton. Person (A) and sample bags (B) for scale. C: Photomicrographs of the leucocratic rocks in plane light (L) and crossed polars (R). D: Photomicrographs of the marginal hornblende gabbro in plane light (L) and crossed polars (R). E-G: Total-alkalis vs silica diagram (E) of…
73	73-AL-15-04-07-02	29.9116	-115.293	Sample 73	SVBB	Kpsf-m	hornblende gabbro (51 wt.% siO2)	San Fernando pluton - Hornblende gabbro (Kpsf-m)	Marginal hornblende gabbro of the San Fernando pluton (Hbld 55%, Plag 40%, Oxides 5%).	A: Outcrop photo of hornblende gabbro. B: Photomicrographs of the hornblende gabbro in plane light (top) and crossed polars (bottom). C-E: Total-alkalis vs silica diagram (C) of sample 73 in comparison to other plutonic rocks (squares) and hypabyssal intrusions (crosses). Black symbols are samples that we interpret to represent liquid compositions and gray symbols are samples that we interpret to…
74	74-AL-15-04-07-03	29.9124	-115.293	Sample 74	SVBB	Kav	trachyandesite	Altered volcanic rocks (Kav)	Altered trachyandesite volcanic rock forming a roof pendant in the the San Fernando pluton.	A-B: Outcrop photos of altered trachyandesite volcanic rock that forms a m-scale roof pendant in the San Fernando pluton. Pendant ~ 3 m high and 5 m wide (A). Sample bag (~30 cm long) for scale (B). C: Photomicrographs in plane light (L) and crossed polars (R) of altered trachyandesite volcanic rock. D-F:Total-alkalis vs silica diagram (D) of sample 74 in comparison to other xenoliths (dashes), h…
80	80-AL-15-04-08-01	29.865	-115.318	Sample 80	SVBB	Kl-s	rhyolite	Lavas of silicic composition, with associated flow breccias (Kl-s)	Rhyolite lava, coherent part sampled.	A: Photomicrographs in plane light (L) and crossed polars (R) of an altered lava with relict feldspar and hornblende phenocrysts, some in glomerocrysts. B-E:Total-alkalis vs silica diagram (B) of sample 80 in comparison to other volcanic rocks (triangles) and hypabyssal intrusions (crosses). Black symbols are samples that we interpret to represent liquid compositions and gray symbols are samples …
106	106-AL-15-04-14-01	29.901	-115.36	Sample 106	SVBB	Kl-m	basaltic andesite	Lavas of mafic composition (Kl-m)	Basaltic andesite peperite intruding silicic tuff turbidite, interpreted as a lava that burrowed into wet sediment. Sample taken from a coherent part of the body.	A: Outcrop photo showing irregular shape of basaltic andesite peperite in a host of silicic tuff turbidite. Upsection from this is a marine ignimbrite (resistant outcrop - photo B). Foot for scale. B: Close-up showing basaltic andesite peperite in a light-colored silicic tuff turbidite host. Resistant ignimbrite (Ki-m) is upsection. C: Photomicrographs in plane light (L) and crossed polars (R) of…
108	108-AL-15-04-14-03	29.901	-115.359	Sample 108	SVBB	no label - dike	basaltic andesite	Dikes of mafic composition	Basaltic andesite dike cross-cutting the marine ignimbrites, ca. 2 m wide. Local epidote alteration along dike margin.	A: Outcrop photo showing the basaltic andesite dike cross-cutting marine ignimbrites on the south side of San Fernando Canyon. Person for scale (see arrow). B: Photomicrographs in plane light (top) and crossed polars (bottom) show sparse plagioclase and clinopyroxene glomerocrysts in a groundmass of flow-aligned plagioclase microlites. C-F: Total-alkalis vs silica diagram (C) of sample 108 in com…
113	113-AL-15-04-14-8	29.8967	-115.363	Sample 113	SVBB	Kim	basaltic andesite	Ignimbrites - marine, nonwelded.	Nonwelded ignimbrite in a section of marine tuff turbidites: white-weathering pumice lapilli tuff, crudely-stratified with pumice-rich and pumice-poor layers.	A: Outcrop photo of nonwelded ignimbrite, showing a massive bed with crude stratification (arrows) defined by pumice-rich and pumice-poor layers. B: Photomicrograph (plane light) of ignimbrite matrix, showing pumice shreds, small crystals and volcanic rock fragments. C: Total-alkalis vs silica diagram (C) of sample 113 in comparison to other ignimbrites, volcaniclastic rocks, hypabyssal intrusion…
115	115-AL-15-04-14-10	29.8925	-115.364	Sample 115	SVBB	Kim	dacite	Ignimbrites - marine, nonwelded.	Nonwelded dacite ignimbrite in a section of silicic marine tuff turbidites forming a 10 m high cliff, with basal load structures up to 5 m deep.	A: Outcrop photo of dacite marine nonwelded ignimbrite forming a 10 m high cliff (top of the ignimbrite shown by dashed line), with basal load structures up to 5 m deep (plain line). Underlain and overlain by silicic tuff turbidites. Person for scale. B: Close-up outcrop photo of nonwelded ignimbrite with basal load structrues, showing the contact between the ignimbrite above and the soft-sedimen…
118	118-AL-15-04-15-02	29.9071	-115.361	Sample 117, 118, and 120	SVBB	Kh-m	basaltic andesite	Sills and plugs of mafic composition (Kh-m)	Basaltic andesite hypabyssal intrusion consisting of a coherent columnar jointed body with no breccias, lensing out very rapidly from 50 m to 0 m over a strike distance of 700 m. Limestone selvages occur between concordant sills. Includes samples 117, 118 and 120.	A: Outcrop photo showing limestone selvage (119) between separate sills from the basaltic andesite hypabyssal intrusion. Sills display columnar jointing (see 120). Sample location for 117 not shown (behind camera view). B: Photomicrograph (crossed polars) of sample 120, showing flow alignment of plagioclase microlites. All samples collected from this intrusion (117, 118, 120) are aphyric. C-F:Tot…
120	120-AL-15-04-15-04	29.9063	-115.362	Sample 117, 118, and 120	SVBB	Kh-m	basaltic andesite	Sills and plugs of mafic composition (Kh-m)	combine with 118	combine with 118
121	121-AL-15-04-15-05	29.9037	-115.363	Sample 121	SVBB	no label - dike	dacite	Dikes of silicic composition	Dacite dike cutting marine ignimbrites, altered.	A: Outcrop photo showing a 1-2 m wide sinuous dike (outlined), cross-cutting poorly exposed silicic tuff turbidites and white-tanned limestone (resistant layers at top of the section). B: Photomicrograph (crossed polars) show a large (3 mm) plagioclase lath, in an altered groundmass with flow-aligned plagioclase microlites. Relict mafic phenocrysts and oxides also present. C - E: Total-alkalis vs…
124	124-AL-15-04-16-02	29.8624	-115.363	Sample 124	SVBB	Ku	andesite	Undifferentiated lavas/hypabyssal intrusions (Ku)	Andesite lava or hypabyssal intrusion, outcropping poorly.	A: Outcrop photo of coherent andesite. Person for scale (circled). B: Photomicrograph (plane light) showing relict hornblende and plagioclase phenocrysts in a microcrystalline groundmass. C - F: Total-alkalis vs silica diagram (C) of sample 124 in comparison to other undifferentiated rocks (circles) and hypabyssal intrusions (crosses). On this diagram (C), black symbols are samples that we interp…
125 (A,B)	125-AL-15-04-16-03	29.8604	-115.366	Sample 125A and 125B	SVBB	no label - dike & Kpsf-f (Xenolith)	125A = tonalite (felsic 68 wt.% siO2); 125B = basaltic andesite	Dikes of mafic composition with felsic (tonalite) xenoliths	Basaltic andesite dike (125B) with tonalite xenoliths (125A) up to 1.5 m in diameter.	A: Outcrop showing tonalite xenolith (sample 125A) within the basaltic andesite dike (sample 125B). B: Photomicrographs in plane light (L) and crossed polars (R) of the tonalite xenolith showing equigranular texture with 55% plagioclase, 35% quartz, and 10% clinopyroxene. Clinopyroxene displays disequilbrium textures (sieved, embayments). C: Photomicrographs in plane light (L) and crossed polars …
173	173-AL-15-04-24-4	29.9508	-115.356	Sample 173	SVBB	Kpsf-f	tonalite (67 wt.% siO2)	San Fernando pluton - tonalite (Kpsf-f)	Main phase San Fernando tonalite (Plag 55%, Qtz 30%, Hbld 15%, Oxides <1%) with abundant fine-grained mafic to intermediate enclaves.	A: Photomicrograph (plane light) of the tonalite. B-D: Total-alkalis vs silica diagram (B) of sample 173 in comparison to other plutonic rocks (squares) and hypabyssal intrusions (crosses). Black symbols are samples that we interpret to represent liquid compositions and gray symbols are samples that we interpret to have been affected by accumulation of major or trace phases. Extended trace elemen…
232	232-AL-16-03-17-6	29.963	-115.321	Sample 232	SVBB	Kpsf-m	hornblende cumulate (50 wt.% siO2)	San Fernando pluton - Hornblende gabbro (Kpsf-m)	Marginal hornblende gabbro of the San Fernando pluton (Hbld 55%, Plag 40%, Oxides <5%). Trace element chemistry indicates the gabbro is a hornblende cumulate.	A: Photomicrograph (plane light) of the marginal hornblende gabbro of the San Fernando pluton. B-D: Total-alkalis vs silica diagram (B) of sample 232 in comparison to other plutonic rocks (including cumulates) and hypabyssal intrusions (crosses). Black symbols are samples that we interpret to represent liquid compositions and gray symbols are samples that we interpret to have been affected by acc…
233	233-AL-16-03-18-1	29.9625	-115.316	Sample 233	SVBB	Kpsf-f	tonalite (63 wt.% siO2)	San Fernando pluton - tonalite (Kpsf-f)	Main phase tonalite of the San Fernando pluton (Plag 55%, Qtz 30%, Hbld 15%, Oxides <1%) with abundant fine-grained mafic to intermediate enclaves (<10 cm).	A: Outcrop photo of the main phase San Fernando pluton. The pluton forms a rounded hill-top morphology. B-C: Outcrop photo of the main phase tonalite of the San Fernando pluton with abundant fine-grained mafic to intermediate enclaves (outlined - photo C). Field book (B) and hand lens (C) for scale. D: Photomicrograph (plane light) of the main phase tonalite of the San Fernando pluton. E-G: Total…
70 (A,B,C)	70-AL-15-04-06-06	29.9172	-115.31	Sample 70A to 70C	SVBB	Kpsf-f	70C: andesite	Leucocratic rocks of the San Fernando Pluton (Kpsf-f; 70B ), and undifferentiated lavas/hypabyssal rocks (Ku; 70A and C)	Intrusions of leucocratic rocks (70B: Qtz 55%, Albite 25%, K-spar 15%, Hbld 5%) into undifferentiated lavas/hypabyssal intrusions (70A, 70C) in the roof of the San Fernando pluton.	A: Outcrop photo of lavas/hypabyssal intrusions (70A and C) and intruding leucocratic rocks (70B) of the San Fernando pluton. B: Outcrop photo of lava/hypabyssal intrusion (70A) and intruding leucocratic rocks (70B) of the San Fernando pluton. Sample bags for scale. C: Outcrop photo of the lava/hypabyssal intrusion in the roof of the San Fernando pluton. Sample bag (~30 cm long) for scale. D: Pho…
39	39-AL-15-04-02-1	29.9501	-115.328	Sample 39	SVBB	Kpsf-f		San Fernando pluton - tonalite (Kpsf-f)	Main phase tonalite of the San Fernando pluton (Plag 50%, Qtz 35%, Bio <10%, Hbld <10%).	A: Outcrop photo of tonalite. B-C: Outcrop photos of tonalite with hammer (B) and pen (C) for scale. D: Photomicrographs of the tonalite in plane light (L) and crossed polars (R). Hornblende is very altered.
40	40-AL-15-04-02-2	29.9501	-115.326	Sample 40	SVBB	Kpsf-m		San Fernando Pluton - hornblende gabbro (Kpsf-m)	Hornblende gabbro of the San Fernando pluton (Plag 75%, Hbld 25%, Oxides <1%).	A: Outcrop photo of hornblende gabbro (hammer for scale). B: Close-up outcrop photo of the hornblende gabbro. Hornblende crystals appear slightly aligned. C: Photomicrographs of the hornblende gabbro in plane light (L) and crossed polars (R). Photomicrographs of the hornblende gabbro in plane light (L) and crossed polars (R). Outcrop has a coarser texture than nearby outcrops (39, 41).
42	42-AL-15-04-02-4	29.9467	-115.319	Sample 42	SVBB	Kav		Altered volcanic rocks (Kav)	Altered volcanic rock forming a roof pendant in the San Fernando pluton.	A: Outcrop photo of altered volcanic rock (chisel for scale). B: Photomicrographs in plane light (L) and crossed polars (R) showing altered plagioclase and mafic phenocrysts, some in relict glomerocrysts.
43	43-AL-15-04-02-05	29.9475	-115.317	Sample 43	SVBB	Kpsf-i		San Fernando pluton - tonalite (Kpsf-i)	Mixed hybrid tonalite (complex mixture of tonalite and gabbro) of the San Fernando pluton (Plag 60%, Quartz 30%, Cpx 15%).	A: Outcrop photo of the mixed hybrid tonalite (complex mixture of tonalite and gabbro) of the San Fernando pluton. B: Photomicrographs of mixed hybrid tonalite in plane light (L) and crossed polars (R). Clinopyroxene grains display disequilibrium textures (sieved, embayments).
44	44-AL-15-04-02-06	29.9479	-115.317	Sample 44	SVBB	Kpsf-i		San Fernando pluton - tonalite (Kpsf-i)	Tonalite of the San Fernando pluton (Plag 65%, Hbld 20%, Qtz <15%, Oxides <5%).	A: Photomicrographs in plane light (L) and crossed polars (R) of the tonalite of the San Fernando pluton.
45 (A,B)	45-AL-15-04-02-07	29.9491	-115.316	Samples 45A and 45B	SVBB	Kpsf-i		San Fernando pluton - tonalite and leucocratic rocks (Kpsf-f)	Mixed hybrid tonalite (complex mixture of tonalite and gabbro) of the San Fernando pluton (45A: Plag 40%, Qtz 50%, Cpx 10%). Leucocratic intrusion crossing-cutting the tonalite (45B: Qtz 70%, Feldspar 25%, Hbld <5%, Titanite <<1%).	A: Outcrop photo of the mixed hybrid tonalite (complex mixture of tonalite and gabbro). Person for scale (circled). B: Outcrop photo of the mixed hybrid tonalite (45A) with cm-scale leucocratic intrusion (47B). Hammer for scale. C: Photomicrographs of the mixed hybrid tonalite (45A) in plane light (L) and crossed polars (R). Clinopyroxene displays disequilibrium textures (sieved, embayments, disa…
49	49-AL-15-04-03-03	29.9346	-115.329	Sample 49	SVBB	Kpsf-m		San Fernando pluton - hornblende gabbro (Kpsf-m)	Hornblende gabbro of the San Fernando pluton (Plag 55%, Hbld 40%, Oxides 5%).	A-B: Outcrop photo of the hornblende gabbro (A), hammer for scale. Close-up photo of hand sample (B). C: Photomicrographs of the hornblende gabbro in plane light (L) and crossed polars (R).
50 (A,B)	50-AL-15-04-03-04	29.9368	-115.333	Sample 50A and 50B	SVBB	Kpsf-f/m		San Fernando pluton - hornblende gabbro (Kpsf-m) and felsic intrusions of leucocratic rocks	Hornblende gabbro of the San Fernando pluton (50A: Plag 60%, Hbld 40%, Oxides <1%) with m-scale (<5 m) leucocratic intrusions (50B: Qtz 50%, Albite 25%, K-spar 25%, Oxides <1%, Alt Hbld <1%).	A: Outcrop photo of hornblende gabbro, hammer for scale. B: Outcrop photo of m-scale (<5 m) leucocratic intrusion (sample 50B). Hammer for scale. C: Photomicropgraphs of the hornblende gabbro (sample 50A) in plane light (L) and crossed polars (R). D: Photomicrographs of the leucocratic dike (sample 50B) in plane light (L) and crossed polars (R). Hornblende is altered. Feldspars are heavily serici…
51	51-AL-15-04-03-5	29.9395	-115.332	Sample 51	SVBB	Kpsf-f		San Fernando pluton - tonalite (Kpsf-f)	Main phase San Fernando tonalite (Qtz 50%, Plag 40%, Hbld 10%, Oxides <1%)	A: Outcrop photo of tonalite. Sample bag (30 cm) for scale. B: Photomicrographs of tonalite in plane light (top) and crossed polars (bottom).
52 (A,B)	52-AL-15-04-03-06	29.9465	-115.335	Sample 52A and 52B	SVBB	Kpsf-f		San Fernando pluton - tonalite (Kpsf-f)	Main phase tonalite of the San Fernando pluton (Quartz 50%, Plag 40%, Hbld 10%). Coarser (52A) and finer (52B) areas within outcrop.	A: Outcrop photo of tonalite, person for scale. B: Outcrop surface of coarser-grained tonalite, field book for scale. C: Hand sample of finer-grained tonalite (52B). Fine-grained mafic enclaves visible in hand sample. D: Photomicrograph of the finer-grained tonalite (52B) in plane light. Plagioclase is altered (darker fine-grained mineral in groundmass). E: Photomicrographs of the coarser-grained…
53 (A,B)	53-AL-15-04-03-07	29.9504	-115.332	Sample 53	SVBB	Kpsf-i		San Fernando pluton - tonalite (Kpsf-i)	Main phase tonalite of the San Fernando pluton (53A: Plag 50%, Qtz 25%, Hbld 20%, Oxides 5%) with fine-grained mafic to intermediate enclaves (53B: Plag 50%, Hbld 40%, Oxides 10%).	A: Outcrop photo of tonalite. B: Outcrop photos of tonalite, with visible fine-grained mafic to intermediate enclaves. C: Photomicrographs of tonalite (53A) in plane light (L) and crossed polars (R). D: Photomicrographs of fine-grained enclaves (53B) in plane light (L) and crossed polars (R).
59	59-AL-15-04-04-05	29.936	-115.344	Sample 59	SVBB	Kpsf-f		San Fernando pluton - tonalite (Kpsf-f)	Main phase tonalite of the San Fernando pluton (Qtz 50%, Plag 35%, Hbld 10%, Cpx 5%, Titanite 1%)	A: Outcrop photo of the main phase tonalite of the San Fernando pluton (sample 59), that subvertically intrudes the nearby silicic lava dome (sample 58). Person for scale (circled). B: Contact between the main phase tonalite of the San Fernando pluton (sample 59) and silicic lava dome (sample 58).The San Fernando tonalite intrudes the silicic lava dome subvertically. C: Close-up outcrop photo of …
61	61-AL-15-04-05-02	29.9175	-115.316	Sample 61	SVBB	Ku		Undifferentiated lavas/hypabyssal intrusions (Ku)	Lava or hypabyssal intrusion, crystal rich, with scattered xenoliths. Irregular dark and light patches suggestive of a comingled magma.	A: Outcrop photo showing abundant crystals and irregular patches of a darker, crystal poor phase, and a lighter, crystal rich phase, suggestive of a comingled magma. B: Photomicrographs in plane light (L) and crossed polars (R) showing abundant crystals including plagioclase and lesser clinopyroxene. Sample collected from the darker, crystal poor phase.
62	62-AL-15-04-05-3	29.9188	-115.315	Sample 62	SVBB	Kpsf-f		San Fernando pluton - leucocratic intrusion	Leucocratic intrusion of the San Fernando pluton (Qtz 50%, Albite 25%, K-spar 15-20%, remnant Hbld 5-10%, Oxides <3%), intruding undifferentiated volcanic rock in the roof of the pluton.	A: Outcrop photo of the leucocratic intrusion of the San Fernando pluton, intruding undifferentiated volcanic rock in the roof of the pluton. Field map (~ 30 cm) for scale. B: Leucocratic rock of the San Fernando pluton intruding the overlying undifferentiated volcanic rock(hammer for scale). The leucocratic intrusion shows a gradational decrease in xenoliths and hornblende from photo left to rig…
65	65-AL-15-04-06-01	29.9125	-115.287	Sample 65	SVBB	Kpsf-m		San Fernando pluton - hornblende gabbro (Kpsf-m)	Hornblende gabbro of the San Fernando pluton (Hbld 55%, Plag 40%, Oxides 5%)	A: Outcrop photo of the hornblende gabbro (people for scale). White line indicates contact with above volcanic debris flow deposits (Kvdf-s) in the roof of the pluton. B: Photomicrographs of the hornblende gabbro in plane light (L) and crossed polars (R).
66A and 66B	66-AL-15-04-06-02	29.9122	-115.311	Sample 66A and 66B	SVBB	Ku, Kpsf-f	66A: andesite; 66B: trachyandesite	Undifferentiated lavas/hypabyssal intrusions (Ku)	Coherent andesite and trachyandesite lava or hypabyssal intrusion, which is intruded by small (cm-scale) leucocratic intrusions from the San Fernando pluton. For outcrop descriptions on the plutonic rocks, see sample window 66CDE.	A: Outcrop photo showing A-E sampling localities along the contact between the San Fernando plutonic rocks (66C - 66E), which intrude the above undifferentiated volcanics (66A, 66B). For outcrop descriptions on the plutonic rocks, see sample window 66CDE. B-C: Small (cm-scale) leucocratic intrusions into the undifferentiated volcanics (66A, 66B) near the contact of the San Fernando pluton (~ 7 m …
66C to 66E	66-AL-15-04-06-02	29.9122	-115.311	Sample 66C to 66E	SVBB	Kspf-f	66C: tonalite (67 wt.% siO2); 66D2: tonalite (64 wt.% siO2); 66D1: feldspar cumulate (70 wt.%)	San Fernando pluton - tonalite and leucocratic rocks (Kpsf-f)	Tonalite (Plag 55-60%, Qtz 20-30%, Hbld 10-25%) and leucocratic rocks (Qtz 55%, Albite 25%, K-spar 15%, Hbld 5%) of the San Fernando pluton. The tonalite and leucocratic rocks are intrusive with the above undifferentiated volcanic rocks (see sample window 66AB). Angular mafic xenoliths (66D3) occur within a late-stage intrusions (66D1 and 66D2).	A: Outcrop photo showing A-E sampling localities along the contact between the San Fernando plutonic rocks (66D - 66E), which intrude the above undifferentiated volcanic rocks (66A, 66B). For outcrop descriptions on the undifferentiated volcanic rocks see sample window 66AB. Samples collected from locality 66D (66D1 - D3) are from a later-stage intrusion (outlined), which cross-cuts units in the …
69 (A,B,C)	69-AL-15-04-06-05	29.9171	-115.31	Sample 69A to 69C	SVBB	Kpsf-f/m		San Fernando Pluton - hornblende gabbro (Kpsf-m; 69B), leucocratic intrusions (69A), and undifferentiated lavas/hypabyssal rocks (Ku; 69C)	Intrusions of leucocratic rocks (69A: Qtz 55%, Albite 25%, K-spar 15%, Hbld 5%) into hornblende gabbro margin (69B: Plag 65%, Hbld 30%, Oxides 5%) of the San Fernando pluton. Lavas/hypabyssal rocks in the roof of the San Fernando pluton (69C).	A: Outcrop photo of the marginal hornblende gabbro (69B) and the intruding leucocratic rocks (69A) of the San Fernando pluton, with undifferentiated lavas/hypabyssal intrusions above (69C). Person for scale (circled). B: Outcrop photo of the marginal hornblende gabbro (69B) and the intruding leucocratic rocks (69A) of the San Fernando pluton, field book for scale. Margins of the gabbro are rounde…
71	71-AL-15-04-06-07	29.9174	-115.31	Sample 71	SVBB	Ku		Undifferentiated lavas/hypabyssal intrusions (Ku)	Porphyritic lava or hypabyssal intrusion in the roof of the San Fernando pluton.	A: Photomicrographs in plane light (L) and crossed polars (R) showing abundant phenocrysts of plagioclase and lesser pyroxenes (cpx and opx) in a microcrystalline groundmass. Photomicrographs display flow indicators (aligned minerals, cm-scale flow banding with alternating phenocryst-rich to phenocryst-poor bands).
72	72-AL-15-04-07-01	29.9131	-115.293	Sample 72	SVBB	Kpsf-m		San Fernando pluton - hornblende gabbro (Kpsf-m)	Marginal hornblende gabbro of the San Fernando pluton (Hbld 55%, Plag 40%, Oxides 5%).	A: Outcrop photo of hornblende gabbro, hammer for scale. B: Photomicrographs of the hornblende gabbro in plane light (L) and crossed polars (R).
75	75-AL-15-04-07-04	29.912	-115.301	Sample 75	SVBB	Ku		Undifferentiated lavas/hypabyssal intrusions (Ku)	Undifferentiated lava or hypabyssal intrusion.	A: Photomicrographs in plane light (L) and crossed polars (R) of altered volcanic rock with relict feldspar and hornblende phenocrysts.
76	76-AL-15-04-07-5	29.9137	-115.3	Sample 76	SVBB	no label - luecocratic intrusion		San Fernando pluton - leucocratic intrusions	Intrusion of leucocratic rocks of the San Fernando pluton (Qtz 40%, Albite 40%, K-spar 15%, Hbld 5%, Oxides <1%) into undifferentiated volcanic rocks (Ku). Intrusion is m-scale.	A: Outcrop photo of leucocratic rocks of the San Fernando pluton, which intrude undifferentiated volcanics in the roof of the pluton. B: Photomicrographs of leucocratic rocks in plane light (L) and crossed polars (R). Feldspars include K-spar and albite. Graphic texture of quartz and felspar intergrowth is labelled in the crossed polars photomicrograph.
77	77-AL-15-04-07-06	29.9134	-115.3	Sample 77	SVBB	Ku		Undifferentiated lavas/hypabyssal intrusions (Ku)	Undifferentiated lava or hypabyssal intrusion.	A: Photomicrograph (crossed polars) of an undifferentiated lava or hypabyssal intrusion with relict feldspar phenocrysts. Groundmass is recrystallized.
78	78-AL-15-04-07-07	29.9139	-115.299	Sample 78	SVBB	Kpsf-f		San Fernando pluton - leucocratic intrusions	Intrusion of leucocratic rocks of the San Fernando pluton (Qtz 40%, Albite 40%, K-spar <20%, Hbld <3%, Oxides <1%) into undifferentiated lavas/hypabyssal intrusions (Ku). Leucocratic intrusion is m-scale.	A: Photomicrographs of the leucocratic intrusion in plane light (L) and crossed polars (R). Feldspars include K-spar and albite.
79	79-AL-15-04-07-08	29.9153	-115.297	Sample 79	SVBB	Ku		Undifferentiated lavas/hypabyssal intrusions (Ku)	Undifferentiated porphyritic lava or hypabyssal intrusion, adjacent to a m-scale leucocratic intrusion (sample 78).	A: Photomicrographs in plane light (L) and crossed polars (R) showing abundant plagioclase and hornblende phenocrysts in a recrystallized groundmass; recrystallization probabaly due to contact metamorphism.
81	81-AL-15-04-08-02	29.8659	-115.316	Sample 81	SVBB	Kl-s		Lavas of silicic composition, with associated flow breccias (Kl-s)	Flow breccia very similar in appearance to coherent rhyolite lava (sample 80), probably a flow-top breccia.	A: Outcrop photo of flow breccia upsection from the coherent rhyolite lava flow (sample 80). Hammer for scale. B: Closeup of outcrop showing flow breccia; breccia clasts contain mafic xenoliths ca. 2 cm in size. C: Photomicrograph in plane light (L) and crossed polars (R) of altered silicic volcanic rock with relict feldspar and mafic phenocrysts set in a silicic groundmass. Note mafic xenolith o…
109	109-AL-15-04-14-4	29.9012	-115.36	Site 109	SVBB	Kim		Ignimbrites - marine, nonwelded.	Nonwelded ignimbrite in a section of marine tuff turbidites, ca. 50 m thick, with internal crude stratification in layers meters thick, except for top, which is medium-to thick-bedded. Pumice are altered green and very slightly flattened.	A: Outcrop photo of the upper part of the nonwelded ignimbrite in a section of marine tuff turbidites, showing a transition from pumice-rich (see arrows) massive ignimbrite to tuff turbidites at the top. B: Outcrop photo of the top of the marine ignimbrite, showing massive ignimbrite in the foreground overlain by thin bedded tuff turbidites.
110	110-AL-15-04-14-5	29.9007	-115.36	Site 110	SVBB	Kvt-m		Marine tuff turbidites with dominantly mafic to intermediate clasts (Kvt-m)	Mainly dark-colored tuff turbidites, thin- to medium-bedded.	A: Outcrop photo of mainly dark-colored tuff turbidites, thin- to medium-bedded (these overlie marine ignimbrite, site 109, not shown). At the top of the photo is the base of a marine ignimbrite (dotted line showing the contact).
112	112-AL-15-04-14-7	29.8986	-115.361	Sample 112	SVBB	Kim		Ignimbrites - marine, nonwelded (Kim)	Nonwelded ignimbrite in a section of marine tuff turbidites: white-weathering pumice lapilli tuff, crudely-stratified with pumice-rich and pumice-poor layers, passing upward into well stratified and cross stratified tuffs and pumice lapilli tuffs.	A: Outcrop photo of nonwelded ignimbrite, showing crude stratification defined by pumice-rich and pumice-poor layers. B: Outcrop photo of uppermost 3 m of the ignimbrite, showing laminated and cross laminated very fine-grained tuff to pumice lapilli tuff. C: Photomicrograph (plane light) of ignimbrite matrix, showing pumice shreds, small crystals and sparse volcanic rock fragments.
114	114-AL-15-04-14-09	29.8931	-115.364	Sample 114	SVBB	no label - dike		Dikes of mafic composition	Dike ca. 2 m thick, cross-cutting marine ignimbrite and silicic tuff turbidite.	A: Dike ca. 2 m thick (outlined), cross-cutting marine ignimbrite and silicic tuff turbidite. Person for scale. B: Photomicrographs in plane light (L) and crossed polars (R) show sparse plagioclase phenocrysts set in a groundmass with plagioclase microlites. Some epidote alteration.
116	116-AL-15-04-14-11	29.889	-115.37	Sample 116	SVBB	Kh-i		Sills and plugs of intermediate composition (Kh-i)	Sill with inferred intermediate composition. Same sheeted sill body as sample 25 (see description), as well as samples 24, and 122.	A: Photomicrograph (plane light) shows relict plagioclase laths in a devitrified groundmass.
117	117-AL-15-04-15-01	29.9068	-115.363	Sample 117, 118, and 120	SVBB	Kh-m		Sills and plugs of mafic composition (Kh-m)	combine with 118	combine with 118
119	119-AL-15-04-15-03	29.9063	-115.362	Sample 119	SVBB	Klr			Fossiliferous limestone forming a selavge within basaltic andesite sills (samples 118 and 120).	A: Outcrop photo showing fossil in limestone. B: Outcrop photo showing pitted surface weathering texture on limestone.
122	122-AL-15-04-15-06	29.891	-115.372	Sample 122	SVBB	Kh-i		Sills and plugs of intermediate composition (Kh-i)	Sill with inferred intermediate composition, same sheeted sill body as sample 25 (as well as 24 and 116), see description of sample 25.	A: Photomicrograph (crossed polars) showing sparse plagiocalse phenocrysts in a devitirified groundmass.
126 (A,B,C)	126-AL-15-04-16-04	29.8596	-115.367	Sample 126A, 126B, and 126C	SVBB	Ki-SF & no label - dike		Ignimbrite: tuff of San Fernando, mapped separately because of its thickness (Ki-SF), with intruding dikes of mafic composition	Welded ignimbrite: Upper cooling unit of the tuff of San Fernando (126B) with intruding dikes (126A and 126C). 126A is a mafic dike (2 m wide) that intrudes the tuff of San Fernando (sample 126B), and cross-cuts another mafic dike (sample 126C). 126C is a smaller mafic dike (0.5 m wide) that intrudes the tuff of San Fernando (sample 126B).	A: Outcrop photo showing mafic dikes cross-cutting the tuff of San Fernando (upper cooling unit - lithic rich). B: Close-up photo of dikes: 126C in x-section view and 126A in wash. Both dikes cross-cut the tuff of San Fernando. Dike 126A (in wash) cross-cuts the smaller dike (126C) and the tuff of San Fernando (126B). Oldest to youngest: tuff of San Fernando (126B), small dike (126C), larger dike…
171	171-AL-15-04-24-2	29.9283	-115.341	Sample 171	SVBB	Kav		Altered volcanic rocks (Kav)	Altered volcanic rock of inferred intermediate composition, forming a roof pendant in the San Fernando pluton.	A: Photomicrographs in plane light (L) and crossed polars (R) of altered volcanic rock, showing volcanic clasts, and relict plagioclase and clinopyroxene phenocrysts.
172	172-AL-15-04-24-03	29.9471	-115.345	Sample 172	SVBB	Kpsf-f		San Fernando pluton - tonalite (Kpsf-i)	Main phase tonalite of the San Fernando pluton (Plag 65%, Hbld 20%, Qtz 10%, Oxides 5%) with abundant mafic to intermediate fine-grained enclaves.	A: Photomicrographs of tonalite in plane light (L) and crossed polars (R). Mineralogy is similar to nearby outcrop 53 (see sample 53 for field photos).

## Sheet: Info
This Supplemental Material accompanies
Geological Society of America Special Paper 560
Geology of a Large Intact Extensional Oceanic Arc Crustal Section with
Superior Exposures: Cretaceous Alisitos Arc, Baja California (Mexico)
By Cathy J. Busby, Rebecca A. Morris, Susan M. DeBari, Sarah Medynski,
Keith Purtirka, Graham D.M. Andrews, Axel K. Schmitt, and Sarah R. Brown
